# Supplementary material for: Harmonizing Corporate Carbon Footprints
Source: Research Square preprint supplement (doi:10.21203/rs.3.rs-99537/v1), 2020-11-30
Supplement: Supplementary file 2 [file 3573fb054f2dc68f8b3b5a73.xlsx]

## Sheet: Contents
Supplementary Data (13 tables in total)
1 Results
1.1 Harmonized corporate carbon footprints
2 Calculations
2.1 Activity exclusion
2.2 Boundary incompleteness
2.3 Reporting inconsistency
2.4 Carbon intensities
3 Input data
3.1 Emissions data
3.2 Emissions predictors
3.3 Minimum boundaries (scope 3 categories)
3.4 Company selection
4 Raw data
4.1 Corporate reports
4.2 CDP reponses 2019 C.0-5
4.3 CDP reponses 2019 C.6
4.4 CDP reponses 2019 C.7-14

## Sheet: Remarks
General Remarks
Abbreviations
CR	Corporate report
CDP	Carbon Disclosure Project
ITSS	IT Software & Services
THE	Technology Hardware & Technology
MWh	Megawatt hour
USD	US dollars
g CO2e	gram CO2 equivalent
t CO2e	tons CO2 equivalent
Mt CO2e	megatons CO2 equivalent
Definitions
Scope 1 emissions	Direct emissions from a company’s own activities
Scope 2 emissions	Emissions from the production of purchased energy
Scope 3 emissions	Emissions from up- and downstream activities along the value chain
Reporting inconsistency	Lower level of emission reported in CR than in the CDP response
Boundary incompleteness	Minimum boundaries set by the GHG Protocol are not met
Activity exclusion	Relevant scope 3 categories are entirely excluded
General color code
	authors' calculation
	raw data
	values that appear in the main text
light grey text	only relevant to build diagrams and graphs

## Sheet: 1.1 Harmomized CCF
		Harmonized corporate carbon footprints
								IT software & services (ITSS) companies																						Technology Hardware & Equipment (THE) companies
					IT software & services (ITSS)	Technology Hardware & Equipment (THE)	All	Microsoft	Alphabet	IBM	Oracle	SAP	Accenture	Tata Consultancy Services	Salesforce.com	Adobe	VMware	Infosys	Capgemini	ATOS	Intuit	Wipro	HCL Technologies	Synopsys	Tech Mahindra	ServiceNow	Autodesk	Shopify	Nomura Research Institute	Apple	Samsung Electronics	Cisco Systems	Hon Hai Precision	HP	Dell Technologies	Hewlett Packard Enterprise	TE Connectivity	Fujitsu	Murata Manufacturing	Corning	Western Digital	BOE Technology Group	Nokia	Kyocera	Lenovo Group	Ericsson	Amphenol	Seagate Technology	TDK
	Industry level	Scope 1 emissions		t CO2e	599498	1.41213e+07	1.47208e+07	90723	63521	124633	17084	144163	22183	27375	4701	12119	4454	12532	7343.41	30383	2045	13424	10147	4665.5	2561.04	0	2655	1081.22	1704.88	54590	4855000	41171	99499	65900	58965	67657	148227	147000	311647	593561	46269.3	6308208	135012	135747	6031	54000	67197	259307	120978
		Scope 2 emissions		t CO2e	4.06213e+06	3.93158e+07	4.33779e+07	183329	684236	963304	362448	157086	218855	409991	157967	58874	15237	124026	154643	63675	7622	103866	173542	35691.2	108418	13550	72	1006.61	64694.1	8730	10318000	205141	8.30148e+06	163700	313836	204558	504972	808000	1319997	1815321	1.11028e+06	4719308	364915	897555	201321	133910	278920	890010	1548755
		Scope 3 emissions from CR		t CO2e	35348970	2.66526e+08	3.01875e+08	17334520	14279467	329409	0	432751	948756	0	155000	51101	378123	343028	338201	0	0	380946	0	42724.2	39188.3	0	175045	0	120711	25070500	15908000	0	0	47550000	17642626	10019299	23520	6105200	0	0	0	0	44676400	4738391	15805120	32171000	0	16790400	22162308
		Initial carbon footprint		t CO2e	4.00106e+07	3.19963e+08	3.59974e+08	17608572	15027224	1417346	379532	734000	1189794	437366	317668	122094	397814	479586	500188	94058	9667	498236	183689	83080.9	150168	13550	177772	2087.83	187110	25133820	31081000	246312	8.40098e+06	47779600	18015427	10291514	676719	7060200	1631644	2408882	1.15655e+06	11027516	4.51763e+07	5771693	16012472	32358910	346117	17939717	23832041
		Omitted scope 3 emissions		t CO2e	3.96246e+07	3.51472e+08	3.91096e+08	760558	292458	7.20931e+06	3.48099e+06	12919507	2.03664e+06	2.06044e+06	771306	462943	364264	808472	801036	5.23396e+06	52630.3	339980	747969	269816	363406	288262	71337	110850	178439	4.12098e+06	5.48649e+07	4.56903e+07	7.72815e+07	96455.7	1.62216e+07	5878.95	5.94269e+06	210747	7.53502e+06	5.11894e+06	8.48862e+06	6.94161e+06	318006	36001.7	8.3136e+06	5.2245e+06	3.31905e+06	5777.13	90469.7
		Reporting inconsistency		t CO2e	2.39724e+07	9.97143e+07	1.23687e+08	500000	0	1017293	1766048	12919507	0	708758	771306	462943	0	4132.18	405352	5228379	28459	0	56678	0	0	26222	71337	5961.86	0	0	22326000	39520558	0	0	0	0	0	1500	4437221	0	18131.2	33887	0	0	0	0	0	0	0
		Boundary incompleteness		t CO2e	7.79277e+06	7.55973e+07	8.33901e+07	240712	0	5.41568e+06	96517.1	0	854621	505784	0	0	0	0	322028	0	0	0	17076.5	0	161037	0	0	3615.05	175696	0	3.25389e+07	6.16977e+06	0	54299.5	1.46446e+07	0	7525.46	209247	21510.4	0	26105.4	3.4136e+06	81938	27856	8.22617e+06	0	0	5777.13	52475.2
		Activity exclusion		t CO2e	7.85943e+06	1.7616e+08	1.84019e+08	19845.2	292458	776329	1.61843e+06	0	1.18202e+06	845902	0	0	364264	804340	73656.2	5582.9	24171.3	339980	674215	269816	202369	262040	0	101273	2743.32	4.12098e+06	0	0	7.72815e+07	42156.2	1.57701e+06	5878.95	5.93516e+06	0	3.07629e+06	5.11894e+06	8.44438e+06	3.49412e+06	236068	8145.78	87433.7	5.2245e+06	3.31905e+06	0	37994.5
		Total scope 3 emissions		t CO2e	7.49735e+07	6.17997e+08	6.92971e+08	1.80951e+07	1.45719e+07	7.53871e+06	3.48099e+06	13352258	2.98539e+06	2.06044e+06	926306	514044	742387	1.1515e+06	1.13924e+06	5.23396e+06	52630.3	720926	747969	312540	402594	288262	246382	110850	299150	2.91915e+07	7.07729e+07	4.56903e+07	7.72815e+07	4.76465e+07	3.38643e+07	1.00252e+07	5.96621e+06	6.31595e+06	7.53502e+06	5.11894e+06	8.48862e+06	6.94161e+06	4.49944e+07	4.77439e+06	2.41187e+07	3.73955e+07	3.31905e+06	1.67962e+07	2.22528e+07
		Harmonized carbon footprint		t CO2e	7.96352e+07	6.71435e+08	7.5107e+08	1.83691e+07	1.53197e+07	8.62665e+06	3.86052e+06	13653507	3.22643e+06	2.49781e+06	1088974	585037	762078	1.28806e+06	1.30122e+06	5.32802e+06	62297.3	838216	931658	352897	513573	301812	249109	112938	365549	2.92548e+07	8.59459e+07	4.59366e+07	8.56825e+07	4.78761e+07	3.42371e+07	1.02974e+07	6.61941e+06	7.27095e+06	9.16666e+06	7.52782e+06	9.64517e+06	1.79691e+07	4.54943e+07	5.80769e+06	2.43261e+07	3.75834e+07	3.66517e+06	1.79455e+07	2.39225e+07
		Total increase from combined effect			0.990352	1.09848	1.08646
		Total increase due to reporting inconsistency			0.599151	0.311643	0.343599
		Total increase due to boundary incompleteness			0.194768	0.236269	0.231656
		Total increase due to acitivity exclusion			0.196434	0.550564	0.511202
		Harmonized carbon footprint / Revenues		g CO2e / USD	137.131	488.086	-
		Initial carbon footprint / Revenues		g CO2e / USD	68.8978	232.591	-
	Company level
		Median increase from combined effect			2.83782	3.33597	3.18226	0.0431925	0.0194619	5.08648	9.1718	17.6015	1.71176	4.71103	2.42803	3.79169	0.915665	1.68577	1.60147	55.6461	5.44432	0.682367	4.07194	3.24762	2.42	21.274	0.401284	53.0933	0.953663	0.163962	1.76522	185.498	9.19911	0.00201876	0.90043	0.000571242	8.78162	0.02985	4.61805	2.12503	7.33958	0.629481	0.00703921	0.00623764	0.519196	0.161455	9.58938	0.00032203	0.00379614
		Median increase due to reporting inconsistency among affected companies			1.9352	0.758287	1.77786	0.0283953	0	0.717745	4.65323	17.6015	0	1.62051	2.42803	3.79169	0	0.00861614	0.8104	55.5868	2.94393	0	0.308554	0	0	1.9352	0.401284	2.85553	0	0	0.718317	160.449	0	0	0	0	0	0.000212459	2.71948	0	0.015677	0.00307295	0	0	0	0	0	0	0
		Median increase due to boundary incompleteness among affected companies			0.828647	0.213542	0.305393	0.0136702	0	3.821	0.254305	0	0.718293	1.15643	0	0	0	0	0.643814	0	0	0	0.0929641	0	1.07238	0	0	1.73149	0.939001	0	1.04691	25.0486	0	0.00113646	0.812894	0	0.0111205	0.0296375	0.0131833	0	0.0225717	0.309553	0.00181374	0.00482631	0.513735	0	0	0.00032203	0.00220188
		Median increase due to acitivity exclusion among affected comapnies			1.17054	0.316855	0.915665	0.00112702	0.0194619	0.547734	4.26427	0	0.993463	1.93408	0	0	0.915665	1.67715	0.147257	0.0593559	2.50039	0.682367	3.67042	3.24762	1.34762	19.3388	0	48.5063	0.0146616	0.163962	0	0	9.19911	0.000882306	0.0875365	0.000571242	8.7705	0	1.88539	2.12503	7.30133	0.316855	0.00522547	0.00141133	0.00546035	0.161455	9.58938	0	0.00159426
		Share of companies affected by all three error types			0.318182	0.235294	0.267857
		Share of companies affected by two error types			0.318182	0.411765	0.375
		Share of companies affected by one error type			0.363636	0.352941	0.357143
		Harmonized carbon intensity		g CO2e / USD	125.792	704.547		155.407	111.822	109.614	97.488	469.193	75.916	119.512	81.8777	64.7881	84.6753	111.039	83.4118	367.45	10.3829	99.7876	110.912	113.07	102.715	116.082	95.8112	105.232	81.2331	111.788	388.017	904.265	487.941	815.606	378.729	336.516	472.815	201.411	650.118	744.15	467.146	1239.25	1710.31	389.778	486.522	1559.48	446.971	1588.1	1913.8
		Carbon intensity (scope 3 from CDP)		g CO2e / USD	84.9472	491.228		153.203	109.688	30.9357	54.1813	469.193	27.9952	54.8385	81.8777	64.7881	44.2015	41.6998	58.0474	367.065	6.35433	59.3138	28.6151	26.6195	30.0335	15.2969	95.8112	7.50044	41.5799	96.0406	241.115	782.812	47.8415	813.963	199.286	336.324	48.3371	195.615	430.416	238.126	56.8937	762.855	1698.36	387.362	320.249	1342.69	42.2094	1587.59	1906.56
		Initial carbon intensity		g CO2e / USD	35.3844	356.017		148.973	109.688	18.0095	9.58414	25.2234	27.9952	20.9266	23.8848	13.5209	44.2015	41.3436	32.0633	6.48676	1.61117	59.3138	21.8677	26.6195	30.0335	5.21154	68.3738	1.94537	41.5799	96.0406	140.321	4.84866	47.8415	813.963	199.286	336.324	48.3371	195.573	115.719	238.126	56.0156	760.518	1698.36	387.362	320.249	1342.69	42.2094	1587.59	1906.56
								Microsoft	Alphabet	SAP	IBM	ATOS	Oracle	Accenture	Tata Consultancy Services	Capgemini	Infosys	Salesforce.com	HCL Technologies	Wipro	VMware	Adobe	Tech Mahindra	Nomura Research Institute	Synopsys	ServiceNow	Autodesk	Shopify	Intuit	Samsung Electronics	Hon Hai Precision	HP	Cisco Systems	Nokia	Ericsson	Dell Technologies	Apple	Lenovo Group	TDK	Pegatron	BOE Technology Group	Seagate Technology	OMRON	Wistron	Samsung SDI	Flex	NEC	Hewlett Packard Enterprise	Jabil Circuit
						Initial carbon footprint		17608572	15027224	734000	1417346	94058	379532	1189794	437366	500188	479586	317668	183689	498236	397814	122094	150168	187110	83080.9	13550	177772	2087.83	9667	31081000	8.40098e+06	47779600	246312	4.51763e+07	32358910	18015427	25133820	16012472	23832041	677411	11027516	17939717	177830	569448	1107511	1189545	5733417	10291514	792390
						Reporting inconsistency		500000	0	12919507	1017293	5228379	1766048	0	708758	405352	4132.18	771306	56678	0	0	462943	0	0	0	26222	71337	5961.86	28459	22326000	0	0	39520558	0	0	0	0	0	0	0	33887	0	13414044	0	9876227	0	0	0	0
						Boundary incompleteness		240712	0	0	5.41568e+06	0	96517.1	854621	505784	322028	0	0	17076.5	0	0	0	161037	175696	0	0	0	3615.05	0	3.25389e+07	0	54299.5	6.16977e+06	81938	0	1.46446e+07	0	8.22617e+06	52475.2	0	3.4136e+06	5777.13	53568	73154.9	1.44511e+06	0	4.68761e+06	0	0
						Activity exclusion		19845.2	292458	0	776329	5582.9	1.61843e+06	1.18202e+06	845902	73656.2	804340	0	674215	339980	364264	0	202369	2743.32	269816	262040	0	101273	24171.3	0	7.72815e+07	42156.2	0	236068	5.2245e+06	1.57701e+06	4.12098e+06	87433.7	37994.5	1.95036e+07	3.49412e+06	0	32290.1	1.24669e+07	522491	1.13274e+07	0	5878.95	9.10216e+06
						Harmonized carbon intesity		0	0	0	0	0	0	0	0	0	0	0	0	0	0	0	0	0	0	0	0	0	0	0	0	0	0	0	0	0	0	0	0	0	0	0	0	0	0	0	0	0	0
						Initial carbon intensity		0	0	0	0	0	0	0	0	0	0	0	0	0	0	0	0	0	0	0	0	0	0	0	0	0	0	0	0	0	0	0	0	0	0	0	0	0	0	0	0	0	0
[truncated: 14 more columns]

## Sheet: 2.1 Activity exclusion
		Activity exclusion
			Excluded and newly calculated categories	IT software & services (ITSS) companies																						Technology Hardware & Equipment (THE) companies
		Company		Microsoft	Alphabet	IBM	Oracle	SAP	Accenture	Tata Consultancy Services	Salesforce.com	Adobe	VMware	Infosys	Capgemini	ATOS	Intuit	Wipro	HCL Technologies	Synopsys	Tech Mahindra	ServiceNow	Autodesk	Shopify	Nomura Research Institute	Apple	Samsung Electronics	Cisco Systems	Hon Hai Precision	HP	Dell Technologies	Hewlett Packard Enterprise	TE Connectivity	Fujitsu	Murata Manufacturing	Corning	Western Digital	BOE Technology Group	Nokia	Kyocera	Lenovo Group	Ericsson	Amphenol	Seagate Technology	TDK	Samsung SDI	NEC	NetApp	Hoya
		Reporting period		July 1 2017	January 1 2018	January 1 2018	January 1 2018	January 1 2018	September 1 2017	April 1 2018	February 1 2018	December 1 2017	February 1 2018	April 1 2018	January 1 2018	January 1 2018	August 1 2017	April 1 2018	April 1 2017	January 1 2018	April 1 2018	January 1 2018	February 1 2018	January 1 2018	April 1 2018	September 29 2017	January 1 2018	August 1 2017	January 1 2018	November 1 2017	February 1 2018	November 1 2017	September 30 2017	April 1 2018	April 1 2018	January 1 2017	January 1 2018	January 1 2018	January 1 2018	April 1 2018	April 1 2018	January 1 2018	January 1 2018	January 1 2018	April 1 2018	January 1 2018	April 1 2018	January 1 2018	April 1 2018
				June 30 2018	December 31 2018	December 31 2018	December 31 2018	December 31 2018	August 31 2018	March 31 2019	January 31 2019	November 30 2018	January 31 2019	March 31 2019	December 31 2018	December 31 2018	July 31 2018	March 31 2019	March 31 2018	December 31 2018	March 31 2019	December 31 2018	January 31 2019	December 31 2018	March 31 2019	September 29 2018	December 31 2018	July 31 2018	December 31 2018	October 31 2018	January 31 2019	October 31 2018	September 29 2018	March 31 2019	March 31 2019	December 31 2017	December 31 2018	December 31 2018	December 31 2018	March 31 2019	March 31 2019	December 31 2018	December 31 2018	December 31 2018	March 31 2019	December 31 2018	March 31 2019	December 31 2018	March 31 2019
				t CO2e	t CO2e	t CO2e	t CO2e	t CO2e	t CO2e	t CO2e	t CO2e	t CO2e	t CO2e	t CO2e	t CO2e	t CO2e	t CO2e	t CO2e	t CO2e	t CO2e	t CO2e	t CO2e	t CO2e	t CO2e	t CO2e	t CO2e	t CO2e	t CO2e	t CO2e	t CO2e	t CO2e	t CO2e	t CO2e	t CO2e	t CO2e	t CO2e	t CO2e	t CO2e	t CO2e	t CO2e	t CO2e	t CO2e	t CO2e	t CO2e	t CO2e	t CO2e	t CO2e	t CO2e	t CO2e
		Scope 1 emissions		90723	63521	124633	17084	144163	22183	27375	4701	12119	4454	12532	7343.41	30383	2045	13424	10147	4665.5	2561.04	0	2655	1081.22	1704.88	54590	4855000	41171	99499	65900	58965	67657	148227	147000	311647	593561	46269.3	6308208	135012	135747	6031	54000	67197	259307	120978	154704	53923	5354	22379
		Scope 2 emissions		183329	684236	963304	362448	157086	218855	409991	157967	58874	15237	124026	154643	63675	7622	103866	173542	35691.2	108418	13550	72	1006.61	64694.1	8730	10318000	205141	8.30148e+06	163700	313836	204558	504972	808000	1319997	1815321	1.11028e+06	4719308	364915	897555	201321	133910	278920	890010	1548755	947860	384494	96532	383391
			market-based	183329	684236	963304	362448	82538	218855	409991	157967	47871	15237	0	128802	0	7622	<Not Applicable>	<Not Applicable>	35691.2	0	<Not Applicable>	72	<Not Applicable>	64694.1	8730	<Not Applicable>	205141	<Not Applicable>	163700	313836	204558	<Not Applicable>	771000	1287752	<Not Applicable>	1.10753e+06	<Not Applicable>	364915	875349	26029	90	<Not Applicable>	902266	1548755	0	384494	<Not Applicable>	<Not Applicable>
			location-based	3000523	4344686	1133030	489917	157086	282026	453391	280961	58874	67524	124026	154643	63675	18883	103866	173542	38554.7	108418	13550	10956	1006.61	65047	776500	10318000	666708	8.30148e+06	252300	436381	335361	504972	808000	1319997	1815321	1.11028e+06	4719308	436944	897555	201321	133910	278920	890010	1566113	947860	403535	96532	383391
		Total Scope 1+2 emissions		274052	747757	1087937	379532	301249	241038	437366	162668	70993	19691	136558	161986	94058	9667	117290	183689	40356.8	110979	13550	2727	2087.83	66399	63320	15173000	246312	8.40098e+06	229600	372801	272215	653199	955000	1631644	2408882	1.15655e+06	11027516	499927	1033302	207352	187910	346117	1149317	1669733	1102564	438417	101886	405770
		Scope 3 emissions		1.80951e+07	1.45719e+07	7.53871e+06	3.48099e+06	13352258	2.98539e+06	2.06044e+06	926306	514044	742387	1.1515e+06	1.13924e+06	5.23396e+06	52630.3	720926	747969	312540	402594	288262	246382	110850	299150	2.91915e+07	7.07729e+07	4.56903e+07	7.72815e+07	4.76465e+07	3.38643e+07	1.00252e+07	5.96621e+06	6.31595e+06	7.53502e+06	5.11894e+06	8.48862e+06	6.94161e+06	4.49944e+07	4.77439e+06	2.41187e+07	3.73955e+07	3.31905e+06	1.67962e+07	2.22528e+07	1.18488e+07	9.98261e+06	2.51229e+06	1.918e+06
		Upstream	Purchased goods and services	11000000	7.5664e+06	2.46595e+06	1355224	713864	1.30845e+06	559450	406579	359426	204427	333054	501693	3.28292e+06	3480	66330.7	233779	95940.1	147995	97001.8	104637	42629.7	84470.4	18500000	3.37753e+07	7.32445e+06	3.43894e+07	18600000	1.82522e+07	2272300	2.31298e+06	1840000	3379889	1.64857e+06	3.29577e+06	2.70689e+06	5.36594e+06	3645685	1.00212e+07	4.80313e+06	1.24069e+06	1200000	7964779	1.38024e+06	5.12261e+06	997510	644724
			Capital goods	500000	2422000	661323	136405	403231	862959	71691	145178	86240.4	49050	187469	66898.2	787701	22067.8	15915.3	56146.8	44937.1	0	44793.4	23213	6816.83	12802.8	3.93868e+06	6.29717e+06	40020	452710	200000	283019	90083	220519	6200	712289	425472	196934	258235	398200	211678	127500	107836	73254.7	200000	626937	487473	335000	40801.9	62057.1
			Fuel- and energy-related activities	550000	288432	530263	21747	79712	0	171198	67890	14804.5	18841	21928	22373.5	91073	0	76659	44065.6	3208.9	0	6353.85	3849	3236.95	5716.32	30685.6	670000	40002	1.41644e+06	100000	140026	93746	182879	71100	95300	704862	245340	640825	141014	161453	12100	39386.5	93350.1	190000	701930	788494	159000	23496.8	35153.7
			Upstream transportation and distribution	100000	237500	33217	9468	0	0	3350	4032	0	3408	0	6757.95	18356	0	0	0	523.77	0	1306.64	7942	574.234	1901.69	400000	11000	36598	1.38101e+06	900000	732974	318186	92884.9	278247	162682	66203.4	132352	108704	384300	45927	633000	192884	49823.8	90000	277621	55427.5	80000	40058	25890.9
			Waste generated in operations	600	4026.22	2573.94	762	1909	1365.75	3145	304	87.21	306.72	173.18	399.53	3475	170.364	760	244.017	484.25	17.6	101.25	684	44.4966	147.359	151620	370000	1096	133217	35874.1	70705.5	1290	8960.03	4900	41897	6386.24	12767.2	10486	20786.6	17423	1920	18606.4	4806.19	5700	8971	12651	8000	3864.15	2497.53
			Business travel	618942	313000	458090	192845	317166	494928	125682	129000	40498	58081	75869	315428	37005	8117	117819	52519.3	18536.3	33247.6	26222	92937	9576.91	8442.06	337300	110000	217500	461583	124299	244986	68553	31045.5	93000	31594.4	22127.5	44236.7	36332.6	81500	37849	53500	110000	16652.9	22777.1	52248	18525.9	51000	47759	8653.65
			Employee commuting	330000	150467	122800	96587.1	47620	310556	280026	26000	10603	42653	57762	225687	107383	15932	79160	21235.1	19971	18965.2	5719.43	13090	2805.7	2827.34	183200	180017	81394	501744	200000	74418.6	247936	46511.6	68000	34730	26860.5	35930.2	39636.6	118400	27668	23600	61000	42790.7	25000	60919.2	14370.9	16000	6104.65	21751.2
			Upstream leased assets	0	0	0	0	0	0	0	127090	2384.14	1356	3959	0	5582.9	0	24302	0	0	0	1095.61	21	481.492	0	0	211086	0	214924	0	114072	0	14455.5	281000	14711.1	10303.1	20597.7	0	0	110	0	0	7753.99	2500	0	0	0	0	4029.35
			Other (upstream)	0	0	0	-	56368	0	0	0	0	0	0	0	0	0	0	0	0	0	0	0	0	0	0	0	0	0	3080000	-	0	0	0	0	0	0	0	0	0	0	0	0	0	0	0	0	0	0
		Downstream	Downstream transportation and distribution	100000	237500	48080.4	37874	10937	0	0	0	0	0	0	0	0	930	0	0	1906.76	0	0	7	655.671	0	900000	7800000	83396	288274	900000	148405	323853	22983.1	550	23147.3	16607	33895.2	23804	43668	28	82082.7	39563.9	13461.6	8000	20520.7	13625.7	1000	10178.3	8372.43
			Processing of sold products	0	0	0	0	0	0	0	0	0	0	0	0	0	0	0	0	0	0	0	0	0	0	0	3500000	0	95999.9	3.97805e+06	49421.4	0	7653.75	23000	7708.42	5530.38	11287.6	0	0	8145.78	0	0	4482.91	2200	6833.71	4537.58	12000	3389.52	2788.15
			Use of sold products	4784000	3.2907e+06	3.18529e+06	1.60276e+06	11721451	0	845902	18000	0	364264	469496	0	900463	0	339980	339980	126321	202369	105232	0	43437.6	182132	4700000	17000000	37865598	3.77443e+07	1.9322e+07	13650000	6577305	3.00922e+06	3649000	3.03072e+06	2.17438e+06	4.43796e+06	3.1167e+06	38410000	609252	12885000	32000000	1.76255e+06	15000000	12521378	614883	4183000	1.33266e+06	1.09622e+06
			End-of-life treatment of sold products	90000	61906.9	17920.6	9017.22	0	0	0	0	0	0	0	0	0	0	0	0	710.689	0	0	2	244.382	15.93	50000	800000	272	149472	200000	76949.3	26047	11916.9	950	350	8610.83	17574.9	0	22642.2	9174	273500	20514.1	6979.92	50000	10640.1	8456068	5000	5277.5	4341.17
			Downstream leased assets	1690	0	0	11653	0	0	0	0	0	0	1789.68	0	0	925.696	incl. In scope 1+2	incl. In scope 1+2	0	0	0	0	165.581	694.272	incl. in scope 1+2 emissions	5300	incl. In scope 1+2	18792.9	6282.13	9674.69	0	1498.29	0	0	1082.62	0	0	2846.76	incl. In scope 1+2	5351.05	2579.2	877.572	0	0	888.274	5000	0	545.807
			Franchises	0	0	0	0	0	0	0	0	0	0	0	0	0	0	0	0	0	0	0	0	0	0	0	0	0		0	0	0	0	0	0	0	0	0	0	0	0	0	0	0	0	0	0	0	0
			Investments	19845.2	0	13213.3	6648.63	0	7135.53	0	2233	0	0	0	0	0	1007.37	0	0	0	incl. In scope 1+2	436.526	0	180.19	0	0	43000	0	33736.7	0	17367.9	5878.95	2689.71	0	0	1943.51	3966.75	0	5110.46	0	0	incl. In other categories	1575.4	0	0	1594.62	5000	1191.16	979.825
		Harmonized carbon footprint		1.83691e+07	1.53197e+07	8.62665e+06	3.86052e+06	13653507	3.22643e+06	2.49781e+06	1088974	585037	762078	1.28806e+06	1.30122e+06	5.32802e+06	62297.3	838216	931658	352897	513573	301812	249109	112938	365549	2.92548e+07	8.59459e+07	4.59366e+07	8.56825e+07	4.78761e+07	3.42371e+07	1.02974e+07	6.61941e+06	7.27095e+06	9.16666e+06	7.52782e+06	9.64517e+06	1.79691e+07	4.54943e+07	5.80769e+06	2.43261e+07	3.75834e+07	3.66517e+06	1.79455e+07	2.39225e+07	1.29513e+07	1.0421e+07	2.61417e+06	2.32377e+06
		Initial carbon footprint (scope 3 from CR)		17608572	15027224	1417346	379532	734000	1189794	437366	317668	122094	397814	479586	500188	94058	9667	498236	183689	83080.9	150168	13550	177772	2087.83	187110	25133820	31081000	246312	8.40098e+06	47779600	18015427	10291514	676719	7060200	1631644	2408882	1.15655e+06	11027516	4.51763e+07	5771693	16012472	32358910	346117	17939717	23832041	1107511	5733417	101886	405770
		Deviation due to activity exclusion		19845.2	292458	776329	1.61843e+06	0	1.18202e+06	845902	0	0	364264	804340	73656.2	5582.9	24171.3	339980	674215	269816	202369	262040	0	101273	2743.32	4.12098e+06	0	0	7.72815e+07	42156.2	1.57701e+06	5878.95	5.93516e+06	0	3.07629e+06	5.11894e+06	8.44438e+06	3.49412e+06	236068	8145.78	87433.7	5.2245e+06	3.31905e+06	0	37994.5	522491	0	1.46702e+06	1.918e+06
																										0.134926	0.0889772	0.000875897		0.00419758	0.00835745	0.00898568	0.0369613	0.000981642	0.0945305	0.0831171	0.0231998		0.00884999	0.0443361	0.00528635	0.00288365	0.022071	0.0119075	0.0281734	0.0411412	0.0335584	0.0162409
		Special case: Calculation without emission predictor	Purchachsed goods and services	0.030395	0.0197937	0.0703386	0.00624736	0.00596993	0	0.0830879	0.0732911	0.0288002	0.025379	0.019043	0.0196391	0.0174004	0	0.106334	0.0589137	0.0102672	0	0.0220419	0.0156221		0.0191085	0.00105118	0.00946691	0.000875503		0.00209879	0.00413492	0.00935106	0.0306524	0.0112572	0.0126476	0.137697	0.0289023		0.00313402	0.0338164	0.000501685	0.00105324	0.0281256	0.0113121	0.0315435	0.0665465	0.0159277	0.00935277
			Fuel- and energy-related activities
			Specific color code:	Excluded and newly calculated categories (Activity exclusion):	Categories we deem to be relevant but not calculated and recalculeted using category specific carbon intensities (see 2.4) and emissions predictors (see 3.2)
				Special case: Activity exclusion recalculated without emission predictor:	Excluded categories which needs to be calculated according to the harmonized distribution of scope 3 emissions in the absence of an emission predictor (only relevant for four emission figures from two scope 3 categories)
				Incomplete and recalculated categories (Boundary incompleteness):	Emission figures we deem to be incomplete and recalculeted using category specific carbon intensities (see 2.4) and emissions predictors (see 3.2)
				Incomplete but unchanged:	Emission figures we deem to be incomplete but left unchanged since they show higher carbon intensities (see 3.1) compared to the median category specific carbon intensities (see 2.4)
[truncated: 19 more columns]

## Sheet: 2.2 Boundary incompleteness
		Boundary incompleteness
				IT software & services (ITSS) companies																						Technology Hardware & Equipment (THE) companies
		Company		Microsoft	Alphabet	IBM	Oracle	SAP	Accenture	Tata Consultancy Services	Salesforce.com	Adobe	VMware	Infosys	Capgemini	ATOS	Intuit	Wipro	HCL Technologies	Synopsys	Tech Mahindra	ServiceNow	Autodesk	Shopify	Nomura Research Institute	Apple	Samsung Electronics	Cisco Systems	Hon Hai Precision	HP	Dell Technologies	Hewlett Packard Enterprise	TE Connectivity	Fujitsu	Murata Manufacturing	Corning	Western Digital	BOE Technology Group	Nokia	Kyocera	Lenovo Group	Ericsson	Amphenol	Seagate Technology	TDK	Samsung SDI	NEC	NetApp	Hoya
		Reporting period		July 1 2017	January 1 2018	January 1 2018	January 1 2018	January 1 2018	September 1 2017	April 1 2018	February 1 2018	December 1 2017	February 1 2018	April 1 2018	January 1 2018	January 1 2018	August 1 2017	April 1 2018	April 1 2017	January 1 2018	April 1 2018	January 1 2018	February 1 2018	January 1 2018	April 1 2018	September 29 2017	January 1 2018	August 1 2017	January 1 2018	November 1 2017	February 1 2018	November 1 2017	September 30 2017	04/2018-03/2019	April 1 2018	January 1 2017	January 1 2018	January 1 2018	January 1 2018	April 1 2018	04/2018-03/2019	January 1 2018	January 1 2018	January 1 2018	April 1 2018	January 1 2018	April 1 2018	January 1 2018	April 1 2018
				June 30 2018	December 31 2018	December 31 2018	December 31 2018	December 31 2018	August 31 2018	March 31 2019	January 31 2019	November 30 2018	January 31 2019	March 31 2019	December 31 2018	December 31 2018	July 31 2018	March 31 2019	March 31 2018	December 31 2018	March 31 2019	December 31 2018	January 31 2019	December 31 2018	March 31 2019	September 29 2018	December 31 2018	July 31 2018	December 31 2018	October 31 2018	January 31 2019	October 31 2018	September 29 2018		March 31 2019	December 31 2017	December 31 2018	December 31 2018		March 31 2019		December 31 2018	December 31 2018	December 31 2018	March 31 2019	December 31 2018		December 31 2018	March 31 2019
				t CO2e	t CO2e	t CO2e	t CO2e	t CO2e	t CO2e	t CO2e	t CO2e	t CO2e	t CO2e	t CO2e	t CO2e	t CO2e	t CO2e	t CO2e	t CO2e	t CO2e	t CO2e	t CO2e	t CO2e	t CO2e	t CO2e	t CO2e	t CO2e	t CO2e	t CO2e	t CO2e	t CO2e	t CO2e	t CO2e	t CO2e	t CO2e	t CO2e	t CO2e	t CO2e	t CO2e	t CO2e	t CO2e	t CO2e	t CO2e	t CO2e	t CO2e	t CO2e	t CO2e	t CO2e	t CO2e
		Scope 1 emissions		90723	63521	124633	17084	144163	22183	27375	4701	12119	4454	12532	7343.41	30383	2045	13424	10147	4665.5	2561.04	0	2655	1081.22	1704.88	54590	4855000	41171	99499	65900	58965	67657	148227	147000	311647	593561	46269.3	6308208	135012	135747	6031	54000	67197	259307	120978	154704	53923	5354	22379
		Scope 2 emissions		183329	684236	963304	362448	157086	218855	409991	157967	58874	15237	124026	154643	63675	7622	103866	173542	35691.2	108418	13550	72	1006.61	64694.1	8730	10318000	205141	8.30148e+06	163700	313836	204558	504972	808000	1319997	1815321	1.11028e+06	4719308	364915	897555	201321	133910	278920	890010	1548755	947860	384494	96532	383391
			market-based	183329	684236	963304	362448	82538	218855	409991	157967	47871	15237	0	128802	0	7622	<Not Applicable>	<Not Applicable>	35691.2	0	<Not Applicable>	72	<Not Applicable>	64694.1	8730	<Not Applicable>	205141	<Not Applicable>	163700	313836	204558	<Not Applicable>	771000	1287752	<Not Applicable>	1.10753e+06	<Not Applicable>	364915	875349	26029	90	<Not Applicable>	902266	1548755	0	384494	<Not Applicable>	<Not Applicable>
			location-based	3000523	4344686	1133030	489917	157086	282026	453391	280961	58874	67524	124026	154643	63675	18883	103866	173542	38554.7	108418	13550	10956	1006.61	65047	776500	10318000	666708	8.30148e+06	252300	436381	335361	504972	808000	1319997	1815321	1.11028e+06	4719308	436944	897555	201321	133910	278920	890010	1566113	947860	403535	96532	383391
		Total Scope 1+2 emissions		274052	747757	1087937	379532	301249	241038	437366	162668	70993	19691	136558	161986	94058	9667	117290	183689	40356.8	110979	13550	2727	2087.83	66399	63320	15173000	246312	8.40098e+06	229600	372801	272215	653199	955000	1631644	2408882	1.15655e+06	11027516	499927	1033302	207352	187910	346117	1149317	1669733	1102564	438417	101886	405770
		Scope 3 emissions		1.80752e+07	14279467	6.76239e+06	1.86257e+06	13352258	1.80338e+06	1.21454e+06	926306	514044	378123	347160	1.06558e+06	5228379	28459	380946	73754.4	42724.2	200225	26222	246382	9576.91	296407	25070500	7.07729e+07	4.56903e+07	0	4.76043e+07	3.22873e+07	10019299	31045.5	6.31595e+06	4.45873e+06	0	44236.7	3.44749e+06	4.47583e+07	4.76625e+06	2.40313e+07	32171000	0	1.67962e+07	2.22148e+07	1.13263e+07	9.98261e+06	1.04527e+06	0
		Upstream	Purchased goods and services	11000000	7.5664e+06	2.46595e+06	1355224	713864	1.30845e+06	559450	406579	359426	204427	relevant, not calculated	501693	3.28292e+06	3480	66330.7	Relevant, not calculated	Relevant, not calculated	147995	Relevant, not calculated	104637	relevant, not calculated	84470.4	18500000	3.37753e+07	7.32445e+06	relevant, not calculated	18600000	1.82522e+07	2272300	relevant, not calculated	1840000	3379889	relevant, not calculated	Relevant, not calculated	2.70689e+06	5.36594e+06	3645685	1.00212e+07	relevant, not calculated	Relevant, not calculated	1200000	7964779	1.38024e+06	5.12261e+06	997510	relevant, not calculated
			Capital goods	500000	2422000	relevant, not calculated	136405	403231	relevant, not calculated	71691	145178	86240.4	49050	187469	relevant, not calculated	787701	relevant, not calculated	15915.3	Relevant, not calculated	Relevant, not calculated	0	Relevant, not calculated	23213	relevant, not calculated	12802.8	relevant, not calculated	6.29717e+06	40020	relevant, not calculated	200000	relevant, not calculated	90083	relevant, not calculated	6200	712289	relevant, not calculated	Relevant, not calculated	relevant, not calculated	398200	211678	127500	relevant, not calculated	Relevant, not calculated	200000	626937	Relevant, not calculated	335000	relevant, not calculated	relevant, not calculated
			Fuel- and energy-related activities	550000	relevant, not calculated	530263	21747	79712	0	171198	67890	14804.5	18841	21928	22373.5	91073	0	76659	Relevant, not calculated	3208.9	0	Relevant, not calculated	3849	relevant, not calculated	5716.32	relevant, not calculated	670000	40002	relevant, not calculated	100000	140026	93746	relevant, not calculated	71100	95300	relevant, not calculated	Relevant, not calculated	640825	relevant, not calculated	161453	12100	relevant, not calculated	Relevant, not calculated	190000	701930	788494	159000	relevant, not calculated	relevant, not calculated
			Upstream transportation and distribution	100000	237500	relevant, not calculated	9468	0	0	3350	4032	0	3408	0	relevant, not calculated	18356	0	0	0	523.77	0	Relevant, not calculated	7942	relevant, not calculated	relevant, not calculated	400000	11000	36598	relevant, not calculated	900000	Relevant, not calculated	318186	relevant, not calculated	278247	162682	relevant, not calculated	Relevant, not calculated	relevant, not calculated	384300	45927	633000	relevant, not calculated	Relevant, not calculated	90000	277621	55427.5	80000	relevant, not calculated	relevant, not calculated
			Waste generated in operations	600	relevant, not calculated	relevant, not calculated	762	1909	relevant, not calculated	3145	304	87.21	306.72	173.18	399.53	3475	relevant, not calculated	760	Relevant, not calculated	484.25	17.6	Relevant, not calculated	684	relevant, not calculated	relevant, not calculated	relevant, not calculated	370000	1096	relevant, not calculated	relevant, not calculated	relevant, not calculated	1290	relevant, not calculated	4900	41897	relevant, not calculated	Relevant, not calculated	relevant, not calculated	relevant, not calculated	17423	1920	relevant, not calculated	Relevant, not calculated	5700	8971	12651	8000	relevant, not calculated	relevant, not calculated
			Business travel	618942	313000	458090	192845	317166	494928	125682	129000	40498	58081	75869	315428	37005	8117	117819	52519.3	18536.3	33247.6	26222	92937	9576.91	8442.06	337300	110000	217500	relevant, not calculated	124299	244986	68553	31045.5	93000	31594.4	relevant, not calculated	44236.7	36332.6	81500	37849	53500	110000	Relevant, not calculated	22777.1	52248	18525.9	51000	47759	relevant, not calculated
			Employee commuting	330000	150467	122800	96587.1	47620	relevant, not calculated	280026	26000	10603	42653	57762	225687	107383	15932	79160	21235.1	19971	18965.2	Relevant, not calculated	13090	relevant, not calculated	2827.34	183200	180017	81394	relevant, not calculated	200000	relevant, not calculated	247936	relevant, not calculated	68000	34730	relevant, not calculated	Relevant, not calculated	39636.6	118400	27668	23600	61000	Relevant, not calculated	25000	60919.2	Relevant, not calculated	16000	relevant, not calculated	relevant, not calculated
			Upstream leased assets	0	0	0	0	0	0	0	127090	2384.14	1356	3959	0	relevant, not calculated	0	24302	0	0	0	Relevant, not calculated	21	relevant, not calculated	0	0	211086	0	relevant, not calculated	0	relevant, not calculated	0	relevant, not calculated	281000	Relevant, not calculated	relevant, not calculated	Relevant, not calculated	0	0	110	0	0	Relevant, not calculated	2500	0	0	0	0	relevant, not calculated
			Other (upstream)	0	0	0	-	56368	0	0	0	0	0	0	0	0	0	0	0	0	0	0	0	0	0	0	0	0	relevant, not calculated	3080000	-	0	0	0	0	relevant, not calculated	0	0	0	0	0	0	0	0	0	0	0	0	0
		Downstream	Downstream transportation and distribution	100000	237500	relevant, not calculated	37874	10937	0	0	0	0	0	0	0	0	930	0	0	Relevant, not calculated	0	0	7	relevant, not calculated	0	900000	7800000	83396	relevant, not calculated	900000	relevant, not calculated	323853	relevant, not calculated	550	relevant, not calculated	relevant, not calculated	Relevant, not calculated	23804	relevant, not calculated	28	relevant, not calculated	relevant, not calculated	Relevant, not calculated	8000	relevant, not calculated	relevant, not calculated	1000	relevant, not calculated	relevant, not calculated
			Processing of sold products	0	0	0	0	0	0	0	0	0	0	0	0	0	0	0	0	0	0	0	0	relevant, not calculated	0	0	3500000	0	relevant, not calculated	3.97805e+06	relevant, not calculated	0	relevant, not calculated	23000	Relevant, not calculated	relevant, not calculated	Relevant, not calculated	0	0	Relevant, not calculated	0	0	Relevant, not calculated	2200	relevant, not calculated	Relevant, not calculated	12000	relevant, not calculated	relevant, not calculated
			Use of sold products	4784000	3.2907e+06	3.18529e+06	relevant, not calculated	11721451	0	relevant, not calculated	18000	0	relevant, not calculated	relevant, not calculated	0	900463	0	relevant, not calculated	Relevant, not calculated	Relevant, not calculated	relevant, not calculated	Relevant, not calculated	0	relevant, not calculated	182132	4700000	17000000	37865598	relevant, not calculated	1.9322e+07	13650000	6577305	relevant, not calculated	3649000	Relevant, not calculated	relevant, not calculated	Relevant, not calculated	relevant, not calculated	38410000	609252	12885000	32000000	Relevant, not calculated	15000000	12521378	614883	4183000	relevant, not calculated	relevant, not calculated
			End-of-life treatment of sold products	90000	61906.9	relevant, not calculated	relevant, not calculated	0	0	0	0	0	0	0	0	0	0	0	0	Relevant, not calculated	0	0	2	relevant, not calculated	15.93	50000	800000	272	relevant, not calculated	200000	relevant, not calculated	26047	relevant, not calculated	950	350	relevant, not calculated	Relevant, not calculated	0	relevant, not calculated	9174	273500	relevant, not calculated	Relevant, not calculated	50000	relevant, not calculated	8456068	5000	relevant, not calculated	relevant, not calculated
			Downstream leased assets	1690	0	0	11653	0	0	0	0	0	0	relevant, not calculated	0	0	relevant, not calculated	incl. In scope 1+2	incl. In scope 1+2	0	0	0	0	relevant, not calculated	relevant, not calculated	incl. in scope 1+2 emissions	5300	incl. In scope 1+2	relevant, not calculated	relevant, not calculated	relevant, not calculated	0	relevant, not calculated	0	0	relevant, not calculated	0	0	relevant, not calculated	incl. In scope 1+2	relevant, not calculated	relevant, not calculated	Relevant, not calculated	0	0	Relevant, not calculated	5000	0	relevant, not calculated
			Franchises	0	0	0	0	0	0	0	0	0	0	0	0	0	0	0	0	0	0	0	0	relevant, not calculated	0	0	0	0	relevant, not calculated	0	relevant, not calculated	0	0	0	0	relevant, not calculated	0	0	0	0	0	relevant, not calculated	Relevant, not calculated	0	0	0	0	0	relevant, not calculated
			Investments	relevant, not calculated	0	relevant, not calculated	relevant, not calculated	0	relevant, not calculated	0	2233	0	0	0	0	0	relevant, not calculated	0	0	0	incl. In scope 1+2	relevant, not calculated	0	relevant, not calculated	0	0	43000	0	relevant, not calculated	0	relevant, not calculated	relevant, not calculated	relevant, not calculated	0	0	relevant, not calculated	Relevant, not calculated	0	relevant, not calculated	0	0	incl. In other categories	Relevant, not calculated	0	0	Relevant, not calculated	5000	relevant, not calculated	relevant, not calculated
		Carbon footprint (adjusted for reporting inconsistency and boundary incompleteness)		1.83493e+07	15027224	7.85032e+06	2.2421e+06	13653507	2.04442e+06	1.65191e+06	1088974	585037	397814	483718	1.22757e+06	5322437	38126	498236	257443	83080.9	311205	39772	249109	11664.7	362806	25133820	8.59459e+07	4.59366e+07	8.40098e+06	4.78339e+07	3.26601e+07	10291514	684244	7.27095e+06	6.09038e+06	2408882	1.20079e+06	1.4475e+07	4.52583e+07	5.79955e+06	2.42386e+07	32358910	346117	1.79455e+07	2.38845e+07	1.24288e+07	1.0421e+07	1.14715e+06	405770
		Initial carbon footprint (scope 3 from CR)		17608572	15027224	1417346	379532	734000	1189794	437366	317668	122094	397814	479586	500188	94058	9667	498236	183689	83080.9	150168	13550	177772	2087.83	187110	25133820	31081000	246312	8.40098e+06	47779600	18015427	10291514	676719	7060200	1631644	2408882	1.15655e+06	11027516	4.51763e+07	5771693	16012472	32358910	346117	17939717	23832041	1107511	5733417	101886	405770
		Deviation due to boundary incompleteness		240712	0	5.41568e+06	96517.1	0	854621	505784	0	0	0	0	322028	0	0	0	17076.5	0	161037	0	0	3615.05	175696	0	3.25389e+07	6.16977e+06	0	54299.5	1.46446e+07	0	7525.46	209247	21510.4	0	26105.4	3.4136e+06	81938	27856	8.22617e+06	0	0	5777.13	52475.2	1.44511e+06	4.68761e+06	979655	0
			Specific color code:	Excluded categories (Activity exclusion):	Categories we deem to be relevant but not calculated according to the details given in the CDP response (see 4.4)
				Incomplete and recalculated categories (Boundary incompleteness):	Emission figures we deem to be incomplete and recalculeted using category-specific carbon intensities (see 2.4) and emissions predictors (see 3.2)
				Incomplete but unchanged	Emission figures we deem to be incomplete but left unchanged since they show higher carbon intensities (see 3.1) compared to the median category specific carbon intensities (see 2.4)
[truncated: 10 more columns]

## Sheet: 2.3 Reporting inconsistency
		Reporting inconsistency
				IT software & services (ITSS) companies																						Technology Hardware & Equipment (THE) companies
		Company		Microsoft	Alphabet	IBM	Oracle	SAP	Accenture	Tata Consultancy Services	Salesforce.com	Adobe	VMware	Infosys	Capgemini	ATOS	Intuit	Wipro	HCL Technologies	Synopsys	Tech Mahindra	ServiceNow	Autodesk	Shopify	Nomura Research Institute	Apple	Samsung Electronics	Cisco Systems	Hon Hai Precision	HP	Dell Technologies	Hewlett Packard Enterprise	TE Connectivity	Fujitsu	Murata Manufacturing	Corning	Western Digital	BOE Technology Group	Nokia	Kyocera	Lenovo Group	Ericsson	Amphenol	Seagate Technology	TDK	Samsung SDI	NEC	NetApp	Hoya
		Scope 3 emissions in CR	t CO2e	17334520	14279467	329409	0	432751	948756	0	155000	51101	378123	343028	338201	0	0	380946	0	42724.2	39188.3	0	175045	0	120711	25070500	15908000	0	0	47550000	17642626	10019299	23520	6105200	0	0	0	0	44676400	4738391	15805120	32171000	0	16790400	22162308	4947	5295000	0	0
		Scope 3 emissions in CDP	t CO2e	17834520	14279467	1346702	1766048	13352258	948756	708758	926306	514044	378123	347160	743553	5228379	28459	380946	56678	42724.2	39188.3	26222	246382	5961.86	120711	25070500	38234000	39520558	0	47550000	17642626	10019299	23520	6106700	4437221	0	18131.2	33887	44676400	4738391	15805120	32171000	0	16790400	22162308	9881174	5295000	65614	0
		Deviation due to reporting inconsistency	t CO2e	500000	0	1017293	1766048	12919507	0	708758	771306	462943	0	4132.18	405352	5228379	28459	0	56678	0	0	26222	71337	5961.86	0	0	22326000	39520558	0	0	0	0	0	1500	4437221	0	18131.2	33887	0	0	0	0	0	0	0	9876227	0	65614	0
		From scope 3	t CO2e	500000	0	1017293	1766048	12919507	0	708758	771306	460559	0	4132.18	405352	5228379	28459	0	56678	0	0	26222	71337	5961.86	0	0	22326000	39520558	0	0	0	0	0	1500	4437221	0	18131.2	33887	0	0	0	0	0	0	0	9876227	0	65614	0
		Upstream	t CO2e	500000		619907	1716521	1187119		708758	751073	460559		4132.18	405352	4327916	27529		56678			26222	71337	5961.86			977700	1571292							4436871		18131.2	33618								805276		65614
		Downstream	t CO2e			397386	49527	11732388			20233					900463	930										21348300	37949266						1500	350			269								9070951
				Microsoft	Alphabet	SAP	ATOS	Oracle	IBM	Accenture	Salesforce.com	Capgemini	Tata Consultancy Services	Adobe	Wipro	VMware	Infosys	Autodesk	Nomura Research Institute	HCL Technologies	Synopsys	Tech Mahindra	Intuit	ServiceNow	Shopify	Nokia	Cisco Systems	Samsung Electronics	Ericsson	Apple	TDK	Dell Technologies	Seagate Technology	Lenovo Group	OMRON	Hewlett Packard Enterprise	Samsung SDI	Compal Electronics	Fujitsu	NEC	Kyocera	Murata Manufacturing	Arista Networks	Delta Electronics	Olympus	Flex	Wistron	NetApp	Jabil Circuit
				17334520	14279467	432751	0	0	329409	948756	155000	338201	0	51101	380946	378123	343028	175045	120711	0	42724.2	39188.3	0	0	0	44676400	0	15908000	32171000	25070500	22162308	17642626	16790400	15805120	0	10019299	4947	0	6105200	5295000	4738391	0	1510074	516217	52486	284363	139157	0	60968
				17834520	14279467	13352258	5228379	1766048	1346702	948756	926306	743553	708758	514044	380946	378123	347160	246382	120711	56678	42724.2	39188.3	28459	26222	5961.86	44676400	39520558	38234000	32171000	25070500	22162308	17642626	16790400	15805120	13414044	10019299	9881174	9.43074e+06	6106700	5295000	4738391	4437221	1510074	609983	492539	284363	139157	65614	60968
				500000	0	12919507	5228379	1766048	1017293	0	771306	405352	708758	462943	0	0	4132.18	71337	0	56678	0	0	28459	26222	5961.86	0	39520558	22326000	0	0	0	0	0	0	13414044	0	9876227	9.43074e+06	1500	0	0	4437221	0	93765.3	440053	0	0	65614	0
[truncated: 17 more columns]

## Sheet: 2.4 Carbon intensities
		Carbon intensities
			Category-specific intensities for IT Software & services sample (n=22)
			All emission figures					Complete emission figures					Incomplete emission figures
		Scope 3 categories	Mean	Median	Increase	Number	Ratio	Mean	Median	Increase	Number	Ratio	Mean	Median	Increase	Number	Ratio
		Purchased goods and services	46.8775	30.3209	1	17	0.772727	63.5497	37.5254	1.23761	12	0.545455	6.86443	5.01277	0.165324	5	0.227273
		Capital goods	280.37	177.966	1	13	0.590909	280.37	177.966	1	13	0.590909	no values	no values		0	0
		Fuel- and energy-related activities	0.247623	0.139599	1	15	0.681818	0.264424	0.168546	1.20736	14	0.636364	0.0124017	0.0124017	0.0888379	1	0.0454545
		Upstream transportation and distribution	1.10523	0.505479	1	9	0.409091	1.10523	0.505479	1	9	0.409091	no values	no values		0	0
		Waste generated in operations	0.0941855	0.0391689	1	14	0.636364	0.0941855	0.0391689	1	14	0.636364	no values	no values		0	0
		Business travel	9.7488	7.7812	1	22	1	10.967	8.43023	1.08341	16	0.727273	6.50021	5.46859	0.702795	6	0.272727
		Employee commuting	0.893481	0.659995	1	19	0.863636	0.943091	0.701426	1.06277	18	0.818182	0.000508348	0.000508348	0.00077023	1	0.0454545
		Upstream leased assets	2.47084	0.423841	1	6	0.272727	2.47084	0.423841	1	6	0.272727	no values	no values		0	0
		Downstream transportation and distribution	0.678258	0.610933	1	6	0.272727	0.678258	0.610933	1	6	0.272727	no values	no values		0	0
		Processing of sold products	no values	no values		0	0	no values	no values		0	0	no values	no values		0	0
		Use of sold products	76.7466	24.0197	1	7	0.318182	106.149	40.4738	1.68503	5	0.227273	3.23978	3.23978	0.13488	2	0.0909091
		End-of-life treatment of sold products	0.304401	0.227708	1	4	0.181818	0.304401	0.227708	1	4	0.181818	no values	no values		0	0
		Downstream leased assets	0.154283	0.154283	1	2	0.0909091	0.154283	0.154283	1	2	0.0909091	no values	no values		0	0
		Franchises	no values	no values		0	0	no values	no values		0	0	no values	no values		0	0
		Investments	0.167895	0.167895	1	1	0.0454545	0.167895	0.167895	1	1	0.0454545	no values	no values		0	0
			Category-specific intensities for Technology Hardware & Equipment sample (n=34)
			All emission figures					Complete emission figures					Incomplete emission figures
		Scope 3 categories	Mean	Median	Increase	Number	Ratio	Mean	Median	Increase	Number	Ratio	Mean	Median	Increase	Number	Ratio
		Purchased goods and services	143.39	64.5391	1	22	0.647059	230.715	206.143	3.19408	12	0.352941	38.5998	25.0015	0.387386	10	0.294118
		Capital goods	223.308	216.502	1	17	0.5	238.18	235.849	1.08936	16	0.470588	0.224719	0.224719	0.00103795	1	0.0294118
		Fuel- and energy-related activities	0.144995	0.114901	1	19	0.558824	0.151028	0.114901	1	17	0.5	0.0967244	0.0967244	0.841809	2	0.0588235
		Upstream transportation and distribution	8.09562	3.35743	1	21	0.617647	9.62055	8.27829	2.46566	17	0.5	1.61469	1.54042	0.458809	4	0.117647
		Waste generated in operations	0.897402	0.745488	1	18	0.529412	0.947796	0.798556	1.07119	17	0.5	0.040705	0.040705	0.0546018	1	0.0294118
		Business travel	2.37819	1.87317	1	29	0.852941	2.61028	2.7669	1.47712	11	0.323529	2.23635	1.6175	0.863506	18	0.529412
		Employee commuting	0.842245	0.447719	1	19	0.558824	1.05876	0.581395	1.29857	15	0.441176	0.0303046	0.0188822	0.0421742	4	0.117647
		Upstream leased assets	2.03095	0.350246	1	16	0.470588	2.35927	1.28834	3.67838	15	0.441176	0.0610336	0.0610336	0.174259	1	0.0294118
		Downstream transportation and distribution	5.0492	1.42105	1	16	0.470588	5.81721	1.64165	1.15524	13	0.382353	1.72116	0.263671	0.185546	3	0.0882353
		Processing of sold products	14.1936	0.546696	1	6	0.176471	14.1936	0.546696	1	6	0.176471	no values	no values		0	0
		Use of sold products	466.762	186.997	1	20	0.588235	488.353	214.945	1.14945	19	0.558824	56.5288	56.5288	0.302298	1	0.0294118
		End-of-life treatment of sold products	69.9917	0.851209	1	15	0.441176	69.9917	0.851209	1	15	0.441176	no values	no values		0	0
		Downstream leased assets	0.263007	0.107021	1	7	0.205882	0.263007	0.107021	1	7	0.205882	no values	no values		0	0
		Franchises	no values	no values		0	0	no values	no values		0	0	no values	no values		0	0
		Investments	0.24426	0.192122	1	4	0.117647	0.24426	0.192122	1	4	0.117647	no values	no values		0	0
		Carbon intensities		g CO2 e	g CO2 e	g CO2 e	g CO2 e	g CO2 e	g CO2 e	g CO2 e	g CO2 e	g CO2 e	g CO2 e	g CO2 e	g CO2 e	g CO2 e	g CO2 e	g CO2 e	g CO2 e	g CO2 e	g CO2 e	g CO2 e	g CO2 e	g CO2 e	g CO2 e	g CO2 e	g CO2 e	g CO2 e	g CO2 e	g CO2 e	g CO2 e	g CO2 e	g CO2 e	g CO2 e	g CO2 e	g CO2 e	g CO2 e	g CO2 e	g CO2 e	g CO2 e	g CO2 e	g CO2 e	g CO2 e	g CO2 e	g CO2 e	g CO2 e	g CO2 e	g CO2 e	g CO2 e
		Scope 1 emissions		0.767538	0.463657	1.58365	0.431414	4.95405	0.521953	1.30981	0.353459	1.34208	0.494889	1.08034	0.470731	2.09538	0.340833	1.5981	1.20797	1.49485	0.512208	0	1.02115	1.00745	0.378862	0.208598	21.9187	0.810453	0.566623	1.12266	0.652268	2.21101	10.5876	4.07202	22.1026	58.6755	2.24097	435.049	5.07565	9.11054	0.12062	2.24066	8.19476	22.9475	9.67824	18.639	2.0503	0.863548	4.38804
		Scope 2 emissions		1.55101	4.99442	12.2402	9.15273	5.39814	5.14953	19.6168	11.8772	6.51982	1.693	10.6919	9.91301	4.39138	1.27033	12.365	20.6597	11.4356	21.6836	5.21154	0.0276923	0.937927	14.3765	0.0333588	46.5824	4.03821	47.2749	2.78876	3.47164	6.6849	36.0694	22.3823	93.6168	179.45	53.7746	325.47	13.7186	60.2386	4.02642	5.55643	34.0146	78.7619	123.9	114.2	14.6195	15.5697	75.1747
			market-based	1.55101	4.99442	12.2402	9.15273	2.83636	5.14953	19.6168	11.8772	5.30132	1.693	0	8.25656	0	1.27033			11.4356	0		0.0276923		14.3765	0.0333588		4.03821		2.78876	3.47164	6.6849		21.3573	91.3299		53.6412		13.7186	58.7483	0.52058	0.00373444		79.8465	123.9	0	14.6195
			location-based	25.3851	31.713	14.3968	12.3716	5.39814	6.63591	21.6933	21.1249	6.51982	7.50267	10.6919	9.91301	4.39138	3.14717	12.365	20.6597	12.3531	21.6836	5.21154	4.21385	0.937927	14.4549	2.96714	46.5824	13.1242	47.2749	4.29813	4.82722	10.9595	36.0694	22.3823	93.6168	179.45	53.7746	325.47	16.4265	60.2386	4.02642	5.55643	34.0146	78.7619	125.289	114.2	15.3435	15.5697	75.1747
		Total Scope 1+2 emissions		2.31854	5.45808	13.8239	9.58414	10.3522	5.67148	20.9266	12.2307	7.8619	2.18789	11.7722	10.3837	6.48676	1.61117	13.9631	21.8677	12.9305	22.1959	5.21154	1.04885	1.94537	14.7553	0.241956	68.5011	4.84866	47.8415	3.91141	4.1239	8.89592	46.6571	26.4543	115.719	238.126	56.0156	760.518	18.7942	69.3491	4.14704	7.7971	42.2094	101.709	133.579	132.839	16.6698	16.4332	79.5627
		Scope 3 emissions	CDP	150.884	104.23	17.1118	44.5972	458.84	22.3237	33.9119	69.6471	56.9262	42.0136	29.9276	47.6637	360.578	4.74317	45.3507	6.74738	13.689	7.83765	10.0854	94.7623	5.55507	26.8246	95.7986	172.614	777.964	0	810.051	195.162	327.428	1.68	169.161	314.697	0	0.878154	2.33703	1679.56	318.013	316.102	1334.9	0	1485.88	1772.98	1190.5	201.331	10.5829	0
		Scope 3 emissions	CR	146.654	104.23	4.18563	0	14.8712	22.3237	0	11.6541	5.65902	42.0136	29.5714	21.6796	0	0	45.3507	0	13.689	7.83765	0	67.325	0	26.8246	95.7986	71.8194	0	0	810.051	195.162	327.428	1.68	169.119	0	0	0	0	1679.56	318.013	316.102	1334.9	0	1485.88	1772.98	0.596024	201.331	0	0
		Upstream	Purchased goods and services	149.824	73.6093	5.01277	58.4145	32.6776	13.0155	2.72904	32.7139	60.547	30.3209		13.4385	249.232	0.800097	9.66737			0.126328		42.337		22.4527	97.4363	48.2166	32.4979		414.035	41.6385	104.438		54.743	295.996			0.126036	202.995	266.513	36.9245			145.773	709.444	0.616979	17.5052	3.68987
			Capital goods	29.0242	96.494		78.5743	276.564		223.188	243.997	177.966	71.1901	537.16		1398.96		110.953			0		346.463		54.2726		0.224719	50.025		235.849		36.9799		8.12948	272.876				502.629	197.156	181.883			546.448	399.237		342.622
			Fuel- and energy-related activities	0.808806		0.0124017	0.02292	0.139599	0	0.305098	0.197493	0.0710314	0.799228	0.139206	0.0758492	0.254059	0	0.526024		0.0272476	0		0.299696		0.0356837		0.0269951	0.0850793		0.207059	0.153036	0.178293		0.0341794	0.0269273			0.000548124		0.0777704	0.104234			0.11374	0.223502	0.400094	0.147124
			Upstream transportation and distribution	1.36204	2.31051		0.408101	0	0	0.224703	0.32442	0	0.505479	0		1.39354	0	0	0	0.204864	0		3.2134			2.10673	0.067137	1.03003		20.034		14.6243		2.05286	14.247				14.7636	3.35743	13.0213			10.9329	24.7284	0.0839366	3.21934
			Waste generated in operations	0.00817222			0.0328447	0.0873858		0.210953	0.0244603	0.0146909	0.0454931	0.0195123	0.0298839	0.263814		0.110766		0.189407	0.00446264		0.276752				2.25824	0.0308463				0.0592903		0.145783	3.66916					1.27369	0.0394958			0.69242	0.799071	1.88947	0.321934
			Business travel	5.15163	3.045	6.97096	8.31224	14.5185	14.1942	9.30084	10.3795	6.82207	8.61464	8.54821	23.5933	2.80933	1.8662	17.1715	5.68917	7.25017	4.99696	10.1441	37.6031	5.24802	2.24394	1.7765	0.67137	6.12142		1.5582	1.87317	3.1508	2.0962	2.7669	0.883113		1.13407	2.15114	3.13098	0.730526	1.10053	4.72103		2.06511	4.65387	0.654915	2.05233	9.86975
			Employee commuting	2.51908	1.68214	0.350257	0.000508348	0.493482		0.659995	0.742857	0.496465	1.76252	0.320645	1.1	1.10554	1.79011	0.461776	0.17684	1.50781	0.21779		1.36354		0.224785	1.38788	0.0280981	1.09695		3.63636		4.13227		0.514614	0.447719			0.0096663	1.16993	0.359965	0.413912	0.623448		0.581395	0.0805871		0.146266
			Upstream leased assets	0	0	0	0	0	0	0	10.2258	0.401619	0.201124	0.446063	0		0	3.5419	0	0	0		0.00849677		0	0	0.0610336	0		0		0		8.36021				0	0	0.00804141	0	0		0.303693	0	0	0	0
			Other (upstream)	0	0	0		2.58028	0	0	0	0	0	0	0	0	0	0	0	0	0	0	0	0	0	0	0	0		68.5607		0	0	0	0		0	0	0	0	0	0	0	0	0	0	0	0	0
		Downstream	Downstream transportation and distribution	0.846024	1.73358		0.956414	0.375842	0	0	0	0	0	0	0	0	0.155	0	0		0	0	0.00269231		0	3.43905	35.2144	1.64165		15.3322		10.5834		0.0152355				0.0185517		0.00187919				0.707965			0.0380228
			Processing of sold products	0	0	0	0	0	0	0	0	0	0	0	0	0	0	0	0	0	0	0	0		0	0	15.8014	0		67.7691		0		0.637119				0	0		0	0		0.19469			0.456274
			Use of sold products	40.4738	24.0197	5.04938		402.799	0		1.35338	0			0	62.1009	0						0		1.43018	17.9595	76.7494	745.386		329.164	150.996	214.945		101.08					1443.98	40.8894	257.7	1327.8		1327.43	1001.71	74.0823	159.049
			End-of-life treatment of sold products	0.761421	0.451875			0	0	0	0	0	0	0	0	0	0	0	0		0	0	0.000769231		0.00354	0.191058	3.61174	0.00535433		3.40716		0.851209		0.0263158	0.0248227			0		0.615705	5.47			4.42478		1018.8	0.190114
			Downstream leased assets	0.0142978	0	0	0.294268	0	0	0	0	0	0		0	0				0	0	0	0				0.0239278					0		0	0		0	0						0	0		0.190114	0
			Franchises	0	0	0	0	0	0	0	0	0	0	0	0	0	0	0	0	0	0	0	0		0	0	0	0		0		0	0	0	0		0	0	0	0	0			0	0	0	0	0
			Investments		0			0		0	0.167895	0	0	0	0	0		0	0	0			0		0	0	0.194131	0		0				0	0			0		0	0			0	0		0.190114
		Total emissions / Revenues	CDP	153.203	109.688	30.9357	54.1813	469.193	27.9952	54.8385	81.8777	64.7881	44.2015	41.6998	58.0474	367.065	6.35433	59.3138	28.6151	26.6195	30.0335	15.2969	95.8112	7.50044	41.5799	96.0406	241.115	782.812	47.8415	813.963	199.286	336.324	48.3371	195.615	430.416	238.126	56.8937	762.855	1698.36	387.362	320.249	1342.69	42.2094	1587.59	1906.56	1323.34	218.001	27.0161	79.5627
		Total emissions / Revenues	CR	148.973	109.688	18.0095	9.58414	25.2234	27.9952	20.9266	23.8848	13.5209	44.2015	41.3436	32.0633	6.48676	1.61117	59.3138	21.8677	26.6195	30.0335	5.21154	68.3738	1.94537	41.5799	96.0406	140.321	4.84866	47.8415	813.963	199.286	336.324	48.3371	195.573	115.719	238.126	56.0156	760.518	1698.36	387.362	320.249	1342.69	42.2094	1587.59	1906.56	133.435	218.001	16.4332	79.5627
[truncated: 10 more columns]

## Sheet: 3.1 Emission data
		Emission data
				IT software & services (ITSS) companies																						Technology Hardware & Equipment (THE) companies
		Company		Microsoft	Alphabet	IBM	Oracle	SAP	Accenture	Tata Consultancy Services	Salesforce.com	Adobe	VMware	Infosys	Capgemini	ATOS	Intuit	Wipro	HCL Technologies	Synopsys	Tech Mahindra	ServiceNow	Autodesk	Shopify	Nomura Research Institute	Apple	Samsung Electronics	Cisco Systems	Hon Hai Precision	HP	Dell Technologies	Hewlett Packard Enterprise	TE Connectivity	Fujitsu	Murata Manufacturing	Corning	Western Digital	BOE Technology Group	Nokia	Kyocera	Lenovo Group	Ericsson	Amphenol	Seagate Technology	TDK	Samsung SDI	NEC	NetApp	Hoya
		Reporting period		July 1 2017	January 1 2018	January 1 2018	January 1 2018	January 1 2018	September 1 2017	April 1 2018	February 1 2018	December 1 2017	February 1 2018	April 1 2018	January 1 2018	January 1 2018	August 1 2017	April 1 2018	April 1 2017	January 1 2018	April 1 2018	January 1 2018	February 1 2018	January 1 2018	April 1 2018	September 29 2017	January 1 2018	August 1 2017	January 1 2018	November 1 2017	February 1 2018	November 1 2017	September 30 2017	April 1 2018	April 1 2018	January 1 2017	January 1 2018	January 1 2018	January 1 2018	April 1 2018	April 1 2018	January 1 2018	January 1 2018	January 1 2018	April 1 2018	January 1 2018	April 1 2018	January 1 2018	April 1 2018
				June 30 2018	December 31 2018	December 31 2018	December 31 2018	December 31 2018	August 31 2018	March 31 2019	January 31 2019	November 30 2018	January 31 2019	March 31 2019	December 31 2018	December 31 2018	July 31 2018	March 31 2019	March 31 2018	December 31 2018	March 31 2019	December 31 2018	January 31 2019	December 31 2018	March 31 2019	September 29 2018	December 31 2018	July 31 2018	December 31 2018	October 31 2018	January 31 2019	October 31 2018	September 29 2018	March 31 2019	March 31 2019	December 31 2017	December 31 2018	December 31 2018	December 31 2018	March 31 2019	March 31 2019	December 31 2018	December 31 2018	December 31 2018	March 31 2019	December 31 2018	March 31 2019	December 31 2018	March 31 2019
				t CO2e	t CO2e	t CO2e	t CO2e	t CO2e	t CO2e	t CO2e	t CO2e	t CO2e	t CO2e	t CO2e	t CO2e	t CO2e	t CO2e	t CO2e	t CO2e	t CO2e	t CO2e	t CO2e	t CO2e	t CO2e	t CO2e	t CO2e	t CO2e	t CO2e	t CO2e	t CO2e	t CO2e	t CO2e	t CO2e	t CO2e	t CO2e	t CO2e	t CO2e	t CO2e	t CO2e	t CO2e	t CO2e	t CO2e	t CO2e	t CO2e	t CO2e	t CO2e	t CO2e	t CO2e	t CO2e
		Scope 1	CDP	90723	63521	124633	17084	144163	22183	27375	4701	12119	4454	12532	7343.41	30383	2045	13424	10147	4665.5	2561.04	0	2655	1081.22	1704.88	54590	4855000	41171	99499	65900	58965	67657	148227	147000	311647	593561	46269.3	6308208	135012	135747	6031	54000	67197	259307	120978	154704	53923	5354	22379
		Scope 2		183329	684236	963304	362448	157086	218855	409991	157967	58874	15237	124026	154643	63675	7622	103866	173542	35691.2	108418	13550	72	1006.61	64694.1	8730	10318000	205141	8.30148e+06	163700	313836	204558	504972	808000	1319997	1815321	1.11028e+06	4719308	364915	897555	201321	133910	278920	890010	1548755	947860	384494	96532	383391
			market-based	183329	684236	963304	362448	82538	218855	409991	157967	47871	15237	0	128802	0	7622	<Not Applicable>	<Not Applicable>	35691.2	0	<Not Applicable>	72	<Not Applicable>	64694.1	8730	<Not Applicable>	205141	<Not Applicable>	163700	313836	204558	<Not Applicable>	771000	1287752	<Not Applicable>	1.10753e+06	<Not Applicable>	364915	875349	26029	90	<Not Applicable>	902266	1548755	0	384494	<Not Applicable>	<Not Applicable>
			location-based	3000523	4344686	1133030	489917	157086	282026	453391	280961	58874	67524	124026	154643	63675	18883	103866	173542	38554.7	108418	13550	10956	1006.61	65047	776500	10318000	666708	8.30148e+06	252300	436381	335361	504972	808000	1319997	1815321	1.11028e+06	4719308	436944	897555	201321	133910	278920	890010	1566113	947860	403535	96532	383391
		Total Scope 1+2 emissions		274052	747757	1087937	379532	301249	241038	437366	162668	70993	19691	136558	161986	94058	9667	117290	183689	40356.8	110979	13550	2727	2087.83	66399	63320	15173000	246312	8.40098e+06	229600	372801	272215	653199	955000	1631644	2408882	1.15655e+06	11027516	499927	1033302	207352	187910	346117	1149317	1669733	1102564	438417	101886	405770
		Scope 3	CDP	17834520	14279467	1346702	1766048	13352258	948756	708758	926306	514044	378123	347160	743553	5228379	28459	380946	56678	42724.2	39188.3	26222	246382	5961.86	120711	25070500	38234000	39520558	0	47550000	17642626	10019299	23520	6106700	4437221	0	18131.2	33887	44676400	4738391	15805120	32171000	0	16790400	22162308	9881174	5295000	65614	0
		Scope 3	CR	17334520	14279467	329409		432751	948756	0	155000	51101	378123	343028	338201			380946		42724.2	39188.3		175045		120711	25070500	15908000		0	47550000	17642626	10019299	23520	6105200					44676400	4738391	15805120	32171000		16790400	22162308	4947	5295000
		Upstream	Purchased goods and services	11000000	7.5664e+06	329409	1355224	713864	453828	40686	406579	359426	204427	relevant, not calculated	179665	3.28292e+06	3480	66330.7	Relevant, not calculated	Relevant, not calculated	498.22	Relevant, not calculated	104637	relevant, not calculated	84470.4	18500000	7900000	1154682	relevant, not calculated	18600000	3686746	2272300	relevant, not calculated	1840000	3379889	relevant, not calculated	Relevant, not calculated	1655	5284000	3645685	1795000	relevant, not calculated	Relevant, not calculated	1200000	7964779	4131	435000	17855	relevant, not calculated
			Capital goods	500000	2422000	relevant, not calculated	136405	403231	relevant, not calculated	71691	145178	86240.4	49050	187469	relevant, not calculated	787701	relevant, not calculated	15915.3	Relevant, not calculated	Relevant, not calculated	0	Relevant, not calculated	23213	relevant, not calculated	12802.8	relevant, not calculated	6000	40020	relevant, not calculated	200000	relevant, not calculated	90083	relevant, not calculated	6200	712289	relevant, not calculated	Relevant, not calculated	relevant, not calculated	398200	211678	127500	relevant, not calculated	Relevant, not calculated	200000	626937	Relevant, not calculated	335000	relevant, not calculated	relevant, not calculated
			Fuel- and energy-related activities	550000	relevant, not calculated	39017	21747	79712	0	171198	67890	14804.5	18841	21928	22373.5	91073	0	76659	Relevant, not calculated	3208.9	0	Relevant, not calculated	3849	relevant, not calculated	5716.32	relevant, not calculated	670000	40002	relevant, not calculated	100000	140026	93746	relevant, not calculated	71100	95300	relevant, not calculated	Relevant, not calculated	3057	relevant, not calculated	161453	12100	relevant, not calculated	Relevant, not calculated	190000	701930	788494	159000	relevant, not calculated	relevant, not calculated
			Upstream transportation and distribution	100000	237500	relevant, not calculated	9468	0	0	3350	4032	0	3408	0	relevant, not calculated	18356	0	0	0	523.77	0	Relevant, not calculated	7942	relevant, not calculated	relevant, not calculated	400000	11000	36598	relevant, not calculated	900000	Relevant, not calculated	318186	relevant, not calculated	69000	162682	relevant, not calculated	Relevant, not calculated	relevant, not calculated	384300	45927	633000	relevant, not calculated	Relevant, not calculated	90000	277621	562	80000	relevant, not calculated	relevant, not calculated
			Waste generated in operations	600	relevant, not calculated	relevant, not calculated	762	1909	relevant, not calculated	3145	304	87.21	306.72	173.18	399.53	3475	relevant, not calculated	760	Relevant, not calculated	484.25	17.6	Relevant, not calculated	684	relevant, not calculated	relevant, not calculated	relevant, not calculated	370000	1096	relevant, not calculated	relevant, not calculated	relevant, not calculated	1290	relevant, not calculated	4900	41897	relevant, not calculated	Relevant, not calculated	relevant, not calculated	relevant, not calculated	17423	1920	relevant, not calculated	Relevant, not calculated	5700	8971	12651	8000	relevant, not calculated	relevant, not calculated
			Business travel	378230	313000	458090	192845	317166	494928	138662	129000	40498	58081	75869	315428	37005	8117	117819	35442.8	18536.3	19707.3	26222	92937	5961.86	8442.06	337300	110000	217500	relevant, not calculated	70000	165854	68553	23520	93000	10084	relevant, not calculated	18131.2	28247	81500	9993	53500	110000	Relevant, not calculated	17000	52248	4385	51000	47759	relevant, not calculated
			Employee commuting	330000	150467	122800	70	47620	relevant, not calculated	280026	26000	10603	42653	57762	225687	107383	15932	79160	21235.1	19971	18965.2	Relevant, not calculated	13090	relevant, not calculated	2827.34	183200	8700	81394	relevant, not calculated	200000	relevant, not calculated	247936	relevant, not calculated	68000	34730	relevant, not calculated	Relevant, not calculated	659	118400	27668	23600	61000	Relevant, not calculated	25000	8444	Relevant, not calculated	16000	relevant, not calculated	relevant, not calculated
			Upstream leased assets	0	0	0	0	0	0	0	127090	2384.14	1356	3959	0	relevant, not calculated	0	24302	0	0	0	Relevant, not calculated	21	relevant, not calculated	0	0	10000	0	relevant, not calculated	0	relevant, not calculated	0	relevant, not calculated	281000	Relevant, not calculated	relevant, not calculated	Relevant, not calculated	0	0	110	0	0	Relevant, not calculated	2500	0	0	0	0	relevant, not calculated
			Other (upstream)	0	0	0	-	56368	0	0	0	0	0	0	0	0	0	0	0	0	0	0	0	0	0	0	0	0	relevant, not calculated	3080000	-	0	0	0	0	relevant, not calculated	0	0	0	0	0	0	0	0	0	0	0	0	0
		Downstream	Downstream transportation and distribution	100000	237500	relevant, not calculated	37874	10937	0	0	0	0	0	0	0	0	930	0	0	Relevant, not calculated	0	0	7	relevant, not calculated	0	900000	7800000	83396	relevant, not calculated	900000	relevant, not calculated	323853	relevant, not calculated	550	relevant, not calculated	relevant, not calculated	Relevant, not calculated	269	relevant, not calculated	28	relevant, not calculated	relevant, not calculated	Relevant, not calculated	8000	relevant, not calculated	relevant, not calculated	1000	relevant, not calculated	relevant, not calculated
			Processing of sold products	0	0	0	0	0	0	0	0	0	0	0	0	0	0	0	0	0	0	0	0	relevant, not calculated	0	0	3500000	0	relevant, not calculated	3.97805e+06	relevant, not calculated	0	relevant, not calculated	23000	Relevant, not calculated	relevant, not calculated	Relevant, not calculated	0	0	Relevant, not calculated	0	0	Relevant, not calculated	2200	relevant, not calculated	Relevant, not calculated	12000	relevant, not calculated	relevant, not calculated
			Use of sold products	4784000	3.2907e+06	397386	relevant, not calculated	11721451	0	relevant, not calculated	18000	0	relevant, not calculated	relevant, not calculated	0	900463	0	relevant, not calculated	Relevant, not calculated	Relevant, not calculated	relevant, not calculated	Relevant, not calculated	0	relevant, not calculated	6435.8	4700000	17000000	37865598	relevant, not calculated	1.9322e+07	13650000	6577305	relevant, not calculated	3649000	Relevant, not calculated	relevant, not calculated	Relevant, not calculated	relevant, not calculated	38410000	609252	12885000	32000000	Relevant, not calculated	15000000	12521378	614883	4183000	relevant, not calculated	relevant, not calculated
			End-of-life treatment of sold products	90000	61906.9	relevant, not calculated	relevant, not calculated	0	0	0	0	0	0	0	0	0	0	0	0	Relevant, not calculated	0	0	2	relevant, not calculated	15.93	50000	800000	272	relevant, not calculated	200000	relevant, not calculated	26047	relevant, not calculated	950	350	relevant, not calculated	Relevant, not calculated	0	relevant, not calculated	9174	273500	relevant, not calculated	Relevant, not calculated	50000	relevant, not calculated	8456068	5000	relevant, not calculated	relevant, not calculated
			Downstream leased assets	1690	0	0	11653	0	0	0	0	0	0	relevant, not calculated	0	0	relevant, not calculated	incl. In scope 1+2	incl. In scope 1+2	0	0	0	0	relevant, not calculated	relevant, not calculated	incl. in scope 1+2 emissions	5300	incl. In scope 1+2	relevant, not calculated	relevant, not calculated	relevant, not calculated	0	relevant, not calculated	0	0	relevant, not calculated	0	0	relevant, not calculated	incl. In scope 1+2	relevant, not calculated	relevant, not calculated	Relevant, not calculated	0	0	Relevant, not calculated	5000	0	relevant, not calculated
			Franchises	0	0	0	0	0	0	0	0	0	0	0	0	0	0	0	0	0	0	0	0	relevant, not calculated	0	0	0	0	relevant, not calculated	0	relevant, not calculated	0	0	0	0	relevant, not calculated	0	0	0	0	0	relevant, not calculated	Relevant, not calculated	0	0	0	0	0	relevant, not calculated
			Investments	relevant, not calculated	0	relevant, not calculated	relevant, not calculated	0	relevant, not calculated	0	2233	0	0	0	0	0	relevant, not calculated	0	0	0	incl. In scope 1+2	relevant, not calculated	0	relevant, not calculated	0	0	43000	0	relevant, not calculated	0	relevant, not calculated	relevant, not calculated	relevant, not calculated	0	0	relevant, not calculated	Relevant, not calculated	0	relevant, not calculated	0	0	incl. In other categories	Relevant, not calculated	0	0	Relevant, not calculated	5000	relevant, not calculated	relevant, not calculated
		Carbon footprint (scope 3 from CDP)	CDP	18108572	15027224	2434639	2145580	13653507	1189794	1146124	1088974	585037	397814	483718	905540	5322437	38126	498236	240367	83080.9	150168	39772	249109	8049.69	187110	25133820	53407000	39766870	8.40098e+06	47779600	18015427	10291514	676719	7061700	6068865	2408882	1.17469e+06	11061403	4.51763e+07	5771693	16012472	32358910	346117	17939717	23832041	10983738	5733417	167500	405770
		Initial carbon footprint (scope 3 from CR)	CR	17608572	15027224	1417346	379532	734000	1189794	437366	317668	122094	397814	479586	500188	94058	9667	498236	183689	83080.9	150168	13550	177772	2087.83	187110	25133820	31081000	246312	8.40098e+06	47779600	18015427	10291514	676719	7060200	1631644	2408882	1.15655e+06	11027516	4.51763e+07	5771693	16012472	32358910	346117	17939717	23832041	1107511	5733417	101886	405770
			Specific color code:	Excluded categories (Activity exclusion):	Categories we deem to be relevant but not calculated according to the details given in the CDP response (see 4.4)
				Incomplete categories (Boundary incompleteness):	Emission figures we deem to be incomplete according to the minimum boudaries (see 3.3 ) and the details given in the CDP response (see 4.4)
				Split up emission figures:	Emission figures which we split up since they include emissions from several categories according to the details given in the CDP responses (see 4.4)
		Classification according to assessment (1=complete; -1=excluded; -0.5=incomplete; 0=not relevant)
		Upstream	Purchased goods and services	1	1	-0.5	1	1	-0.5	-0.5	1	1	1	-1	-0.5	1	1	1	-1	-1	-0.5	-1	1	-1	1	1	-0.5	-0.5	-1	1	-0.5	1	-1	1	1	-1	-1	-0.5	-0.5	1	-0.5	-1	-1	1	1	-0.5	-0.5	-0.5	-1
			Capital goods	1	1	-1	1	1	-1	1	1	1	1	1	-1	1	-1	1	-1	-1	0	-1	1	-1	1	-1	-0.5	1	-1	1	-1	1	-1	1	1	-1	-1	1	1	1	1	-1	-1	1	1	-1	1	-1	-1
			Fuel- and energy-related activities	1	-1	-0.5	1	1	0	1	1	1	1	1	1	1		1	-1	1	0	-1	1	-1	1	-1	1	1	-1	1	1	1	-1	1	1	-1	-1	-0.5	-1	1	1	-1	-1	1	1	1	1	-1	-1
			Upstream transportation and distribution	1	1	-1	1	0	0	1	1		1	0	-1	1	0	0	0	1	0	-1	1	-1	-1	1	1	1	-1	1	-1	1	-1	-0.5	1	-1	-1	-1	1	1	1	-1	-1	1	1	-0.5	1	-1	-1
			Waste generated in operations	1	-1	-1	1	1	-1	1	1	1	1	1	1	1	-1	1	-1	1	1	-1	1	-1	-1	-1	1	1	-1	-1	-1	1	-1	1	1	-1	-1	-1	-1	1	1	-1	-1	1	1	1	1	-1	-1
			Business travel	-0.5	1	1	1	1	1	-0.5	1	1	-0.5	1	1	1	1	1	-0.5	1	-0.5	1	1	-0.5	1	1	1	-0.5	-1	-0.5	-0.5	1	-0.5	1	-0.5	-1	-0.5	-0.5	-0.5	-0.5	1	1	-1	-0.5	1	-0.5	1	-0.5	-1
			Employee commuting	1	1	1	-0.5	1	-1	1	1	1	1	1	1	1	1	1	1	1	1	-1	1	-1	1	1	-0.5	1	-1	1	-1	1	-1	1	1	-1	-1	-0.5	1	1	1	1	-1	1	-0.5	-1	1	-1	-1
			Upstream leased assets	1	1	0	1	1	1	1	1	1	1	1	1	-1	0	1	1	1	0	1	1	-1	1	1	-0.5	1	-1	1	-1	1	-1	1	-1	-1	-1	0	0	1	1	0	-1	1	1	1	1	0	-1
		Downstream	Downstream transportation and distribution	1	1	-1	1	1	0	0	0		0	0	0	0	1	0	0	-1	0	0	1	-1	0	1	1	1	-1	1	-1	1	-1	1	-1	-1	-1	-0.5	-1	1	-1	-1	-1	1	-1	-1	1	-1	-1
			Processing of sold products	0	0	0	0	0	0	0	0		0	0	0	0	0	0	0		0	0	0	-1	0	0	1	0	-1	1	-1	0	-1	1	-1	-1	-1	0	0	-1	0	0	-1	1	-1	-1	1	-1	-1
			Use of sold products	1	1	-0.5	-1	1	0	-1	1		-1	-1	0	1	0	-1	-1	-1	-1	-1	0	-1	-0.5	1	1	1	-1	1	1	1	-1	1	-1	-1	-1	-1	1	1	1	1	-1	1	1	1	1	-1	-1
			End-of-life treatment of sold products	1	1	-1	-1	0	0	0	0		0	0	0	0	0	0	0	-1	0	0	1	-1	1	1	1	1	-1	1	-1	1	-1	1	1	-1	-1	0	-1	1	1	-1	-1	1	-1	1	1	-1	-1
			Downstream leased assets	1	0	1	1	0	0	0	0		0	-1	0	0	-1	1	1		0	0	0	-1	-1	1	1	1	-1	-1	-1	0	-1	0	0	-1	0	0	-1	1	-1	-1	-1	0	0	-1	1	0	-1
			Franchises	0	0	0	0	0	0	0	0		0	0	0	0	0	0	0		0	0	0	-1	0	0	0	0	-1	0	-1	0	0	0	0	-1	0	0	0	0	0	-1	-1	0	0	0	0	0	-1
			Investments	-1	0	-1	-1	0	-1	0	1		0	0	0	0	-1	0	0		1	-1	0	-1	0	0	1	0	-1	0	-1	-1	-1	0	0	-1	-1	0	-1	0	0	0	-1	0	0	-1	1	-1	-1
			Sum	9.5	7	-4.5	5.5	9	-2.5	4	10	7	5.5	3	2.5	7	0	7	-2.5	1	1	-6	10	-14.5	3.5	6	8	9	-15	7.5	-10	10	-13.5	10.5	2.5	-15	-12.5	-4.5	-3	9.5	6.5	-6	-15	10.5	4.5	-2.5	12.5	-11	-15
[truncated: 20 more columns]

## Sheet: 3.2 Emission predictors
		Emission predictors
				IT software & services (ITSS) companies																						Technology Hardware & Equipment (THE) companies
		Company		Microsoft	Alphabet	IBM	Oracle	SAP	Accenture	Tata Consultancy Services	Salesforce.com	Adobe	VMware	Infosys	Capgemini	ATOS	Intuit	Wipro	HCL Technologies	Synopsys	Tech Mahindra	ServiceNow	Autodesk	Shopify	Nomura Research Institute	Apple	Samsung Electronics	Cisco Systems	Hon Hai Precision	HP	Dell Technologies	Hewlett Packard Enterprise	TE Connectivity	Fujitsu	Murata Manufacturing	Corning	Western Digital	BOE Technology Group	Nokia	Kyocera	Lenovo Group	Ericsson	Amphenol	Seagate Technology	TDK	Samsung SDI	NEC	NetApp	Hoya
		Reporting period		July 1 2017	January 1 2018	January 1 2018	January 1 2018	January 1 2018	September 1 2017	April 1 2018	February 1 2018	December 1 2017	February 1 2018	April 1 2018	January 1 2018	January 1 2018	August 1 2017	April 1 2018	April 1 2017	January 1 2018	April 1 2018	January 1 2018	February 1 2018	January 1 2018	April 1 2018	September 29 2017	January 1 2018	August 1 2017	January 1 2018	November 1 2017	February 1 2018	November 1 2017	September 30 2017	April 1 2018	April 1 2018	January 1 2017	January 1 2018	January 1 2018	January 1 2018	April 1 2018	April 1 2018	January 1 2018	January 1 2018	January 1 2018	April 1 2018	January 1 2018	April 1 2018	January 1 2018	April 1 2018
				June 30 2018	December 31 2018	December 31 2018	December 31 2018	December 31 2018	August 31 2018	March 31 2019	January 31 2019	November 30 2018	January 31 2019	March 31 2019	December 31 2018	December 31 2018	July 31 2018	March 31 2019	March 31 2018	December 31 2018	March 31 2019	December 31 2018	January 31 2019	December 31 2018	March 31 2019	September 29 2018	December 31 2018	July 31 2018	December 31 2018	October 31 2018	January 31 2019	October 31 2018	September 29 2018	March 31 2019	March 31 2019	December 31 2017	December 31 2018	December 31 2018	December 31 2018	March 31 2019	March 31 2019	December 31 2018	December 31 2018	December 31 2018	March 31 2019	December 31 2018	March 31 2019	December 31 2018	March 31 2019
		Number of employees		131000	89450	350600	137701	96498	442749	424285	35000	21357	24200	180143	205170	97132	8900	171425	120081	13245	87080	8154	9600	4000	12578	132000	309630	74200	863000	55000	128000	60000	80000	132138	77571	46200	61800	68175	101203	76863	57017	97843	73600	43000	104781	24718	109390	10500	37412
		Revenues	USD	118200000000	137000000000	78700000000	39600000000	29100000000	42500000000	20900000000	13300000000	9030008000	9000000000	11600000000	15600000000	14500000000	6000000000	8400000000	8400000000	3121058000	5000000000	2600000000	2600000000	1073229000	4500000000	261700000000	221500000000	50800000000	175600000000	58700000000	90400000000	30600000000	14000000000	36100000000	14100000000	10116000000	20647000000	14500000000	26600000000	14900000000	50000000000	24100000000	8200000000	11300000000	12500000000	8300000000	26300000000	6200000000	5100000000
		Capital expenditures	USD	17227000000	25100000000	3716000000	1736000000	1458000000	4849000000	3.21214e+08	595000000	484588000	689000000	349000000	3.75904e+08	5.63061e+08	124000000	1.43441e+08	3.15491e+08	252503000	4.52712e+07	251696000	67000000	38304000	2.35898e+08	16700000000	26700000000	800000000	1919488647	848000000	1200000000	2436000000	935000000	762656052	2.6103e+09	1804000000	835000000	-	792235075	1.07366e+09	701000000	4.57223e+08	310600000	366000000	1.57034e+09	2.06689e+09	977753458	173000000	263122000
		Total cost of revenue	USD	38353000000	59549000000	42654000000	7995000000	8.80654e+09	29160515000	3.52179e+08	3451000000	1194999000	1258000000	7687000000	1.13799e+10	0	977000000	5.88985e+09	2.30981e+08	651864000	1.88795e+07	622658000	285900000	476962000	3.02106e+09	163795000000	120335747000	18724000000	1.64602e+11	47586000000	65568000000	21560000000	9234000000	2.59744e+10	8.72671e+09	6084000000	12942000000	1.15431e+10	1.66603e+10	1.0642e+10	43667299000	1.63043e+10	5547100000	7820000000	8.91334e+09	6.4511e+09	1.87917e+10	2201000000	2021435000
		Product	USD	15420000000		7835000000	1360000000					46009000					112000000		2.19789e+08	448430000								14427000000			57889000000																	1752000000	1973001000
		Service and other	USD	22933000000		33687000000	6635000000		29160515000	3.23925e+08	3451000000	1148990000	1258000000		1.13799e+10		865000000			203434000		622658000	285900000					4297000000			7679000000																	449000000	48434000
		Financing	USD			1132000000				2.82542e+07									1.11922e+07		1.88795e+07
		Operating expenses	USD
		Research and development	USD	14726000000	21419000000	5379000000	6026000000	4.27699e+09	4198557000		1886000000	1537812000	1975000000				1186000000			1084822000		529501000	725000000	230674000		14236000000		6332000000	2.80089e+09	1499000000	20640000000	1663000000	680000000		9.09448e+08	860000000	2400000000	7.52547e+08	5.45235e+09		1266341000	4.44752e+09		1026000000				827000000
		Sales and marketing	USD	17469000000	16333000000		8509000000	8.00283e+09	2403315000		6064000000	2610829000	2918000000	638000000	1.23292e+09		1634000000	6.34713e+08		622978000	6.16519e+08	1203056000	1183900000	350069000				9242000000																562000000				1657000000	114594000
		Selling general and administrative	USD	4754000000	8126000000	19366000000	1265000000	1.29584e+09		1.11656e+10	1346000000	744898000	764000000	778000000	1.09934e+09	1.30084e+10	664000000	5.12662e+08	5.40941e+09	262560000	2.48154e+09	296027000	340100000	107444000	8.37555e+08	16705000000	47709444000	2144000000	3.69735e+09	5368000000	4604000000	4851000000	1594000000	8.41826e+09	2.07532e+09	1467000000	1473000000	1.17217e+09	4.0869e+09	3.38799e+09	4925586000	3.14558e+09	959500000		2.60131e+09	1.20093e+09	6.69529e+09	278000000
		Other operating expenses	USD					2.36037e+07		3.77308e+09						5.0155e+08			7.4923e+08		9.28045e+08													8.08124e+07					4.98028e+08										1153348000
		Total operating expenses	USD	75302000000	105427000000	67399000000	23795000000	2.24058e+10	35762387000	1.52908e+10	12747000000	6088538000	6915000000	9103000000	1.37122e+10	1.35099e+10	4461000000	7.03723e+09	6.38962e+09	2622224000	4.04498e+09	2651242000	2534900000	1165149000	3.85862e+09	194736000000	168045191000	36442000000	1.711e+11	54453000000	90812000000	28074000000	11508000000	3.44735e+10	1.17115e+10	8411000000	16815000000	1.34679e+10	2.66976e+10	1.40299e+10	49859226000	2.38975e+10	6506600000	9408000000	1.15147e+10	7.65203e+09	2.5487e+10	4963000000	3289377000
		Energy costs	USD	1882550000	2635675000	1684975000	594875000	5.60145e+08	894059675	3.82271e+08	318675000	152213450	172875000	227575000	3.42805e+08	3.37748e+08	111525000	1.75931e+08	1.5974e+08	65555600	1.01125e+08	6.62811e+07	63372500	2.91287e+07	9.64654e+07	4868400000	4201129775	911050000	4.27751e+09	9529275000	2270300000	6316650000	287700000	8.61836e+08	2.92787e+08	4.13767e+08	8.2719e+08	3.36696e+08	6.67441e+08	3.50749e+08	1246480650	5.97436e+08	4.87995e+08	1176000000	2.87866e+08	9.56504e+08	6.37174e+08	124075000	1.61816e+08
		Operating expenses excl. energy costs	USD	73419450000	102791325000	65714025000	23200125000	2.18457e+10	34868327325	1.49086e+10	12428325000	5936324550	6742125000	8875425000	1.33694e+10	1.31722e+10	4349475000	6.8613e+09	6.22988e+09	2556668400	3.94386e+09	2584960950	2471527500	1136020275	3.76215e+09	189867600000	163844061225	35530950000	1.66823e+11	44923725000	88541700000	21757350000	11220300000	3.36116e+10	1.14187e+10	7.99723e+09	1.59878e+10	1.31312e+10	2.60302e+10	1.36792e+10	48612745350	2.33e+10	6018605000	8232000000	1.12268e+10	6.69553e+09	2.48498e+10	4838925000	3.12756e+09
		Total energy consumption	MWh	7955318	10572485	4666514	1202315	917968	488148	620067	690757	223248	155181	278704	376847	602212	91432	239239	277529	129559	166498	37698	43202	-	160937	2555236	26149300	1.81463e+06	510291	758898	1260555	782151	1610469	2147100	3.55258e+06	6134530	22147136	5622919	1.49578e+06	2496594	347388	742787	816564	1671480	3800281	1974169	1081146	220486	0
		thereof from non-renewable sources	MWh	680015	1711294	3146099	948824	571006	377506	561124	343759	208423	23574	157522	294974	358472	41082	145733	261446	117768	142452	37698	12843	-	160194	267062	24819300	470173	0	482954	914988	525796	1591623	2080200	3.53916e+06	6134530	2.13524e+06	5577204	1.22726e+06	2076020	116085	342787	812442	1670479	3140603	1970771	1080720	204497
		Energy cost as percentage of operating costs (lower limit)		0	0	0	0	0	0	0	0	0	0	0	0	0	0	0	0	0	0	-	0	-	0	0	0	0	0	0.15	0	0.2	0	0	0	-	-	0	0	0	0	0	0.05	0.1	0	0.1	0	0	-
		Energy cost as percentage of operating costs (upper limit)		0.05	0.05	0.05	0.05	0.05	0.05	0.05	0.05	0.05	0.05	0.05	0.05	0.05	0.05	0.05	0.05	0.05	0.05	-	0.05	-	0.05	0.05	0.05	0.05	0.05	0.2	0.05	0.25	0.05	0.05	0.05	-	-	0.05	0.05	0.05	0.05	0.05	0.1	0.15	0.05	0.15	0.05	0.05	-
		Energy cost as percentage of operating costs (average)		0.025	0.025	0.025	0.025	0.025	0.025	0.025	0.025	0.025	0.025	0.025	0.025	0.025	0.025	0.025	0.025	0.025	0.025	0.025	0.025	0.025	0.025	0.025	0.025	0.025	0.025	0.175	0.025	0.225	0.025	0.025	0.025	0.0491935	0.0491935	0.025	0.025	0.025	0.025	0.025	0.075	0.125	0.025	0.125	0.025	0.025	0.0491935
						Scope 3 category	Emission predictor
				Upstream	1	Purchased goods and services	Operating expenses excl. energy costs
					2	Capital goods	Capital expenditures
					3	Fuel- and energy-related activities	Total consumption of non-renewable fuel and energy
					4	Upstream transportation and distribution	Operating expenses excl. energy costs
					5	Waste generated in operations	Operating expenses excl. energy costs
					6	Business travel	Operating expenses excl. energy costs
					7	Employee commuting	Number of employees
					8	Upstream leased assets	Operating expenses excl. energy costs
				Downstream	9	Downstream transportation and distribution	Revenues
					10	Processing of sold products	Revenues
					11	Use of sold products	Revenues
					12	End-of-life treatment of sold products	Revenues
					13	Downstream leased assets	Revenues
					14	Franchises	Revenues
					15	Investments	Revenues
[truncated: 10 more columns]

## Sheet: 3.3 Minimum boundaries
		Minimum boundaries
			Source:	GHG Protocol (2011): Corporate Value Chain (Scope 3) Accounting and Reporting Standard. Supplement to the GHG Protocol Corporate Accounting and Reporting Standard. https://ghgprotocol.org/standards/scope-3-standard
				Scope 3 category	Category description	Minimum Boundary
		Upstream	1	Purchased goods and services	• Extraction, production, and transportation of goods and services purchased or acquired by the reporting company in the reporting year, not otherwise included in Categories 2 - 8	• All upstream (cradle-to-gate) emissions of purchased goods and services
			2	Capital goods	• Extraction, production, and transportation of capital goods purchased or acquired by the reporting company in the reporting year	• All upstream (cradle-to-gate) emissions of purchased capital goods
			3	Fuel- and energy-related activities (not included in scope 1 or scope 2)	• Extraction, production, and transportation of fuels and energy purchased or acquired by the reporting company in the reporting year, not already accounted for in scope 1 or scope 2, including: a. Upstream emissions of purchased fuels (extraction, production, and transportation of fuels consumed by the reporting company) b. Upstream emissions of purchased electricity (extraction, production, and…	a. For upstream emissions of purchased fuels: All upstream (cradle-to-gate) emissions of purchased fuels (from raw material extraction up to the point of, but excluding combustion) b. For upstream emissions of purchased electricity: All upstream (cradle-to-gate) emissions of purchased fuels (from raw material extraction up to the point of, but excluding, combustion by a power generator) c. For T&…
			4	Upstream transportation and distribution	• Transportation and distribution of products purchased by the reporting company in the reporting year between a company’s tier 1 suppliers and its own operations (in vehicles and facilities not owned or controlled by the reporting company) • Transportation and distribution services purchased by the reporting company in the reporting year, including inbound logistics, outbound logistics (e.g., of…	• The scope 1 and scope 2 emissions of transportation and distribution providers that occur during use of vehicles and facilities (e.g., from energy use) • Optional: The life cycle emissions associated with manufacturing vehicles, facilities, or infrastructure
			5	Waste generated in operations	• Disposal and treatment of waste generated in the reporting company’s operations in the reporting year (in facilities not owned or controlled by the reporting company)	• The scope 1 and scope 2 emissions of waste management suppliers that occur during disposal or treatment • Optional: Emissions from transportation of waste
			6	Business travel	• Transportation of employees for business-related activities during the reporting year (in vehicles not owned or operated by the reporting company)	• The scope 1 and scope 2 emissions of transportation carriers that occur during use of vehicles (e.g., from energy use) • Optional: The life cycle emissions associated with manufacturing vehicles or infrastructure
			7	Employee commuting	• Transportation of employees between their homes and their worksites during the reporting year (in vehicles not owned or operated by the reporting company)	• The scope 1 and scope 2 emissions of employees and transportation providers that occur during use of vehicles (e.g., from energy use) • Optional: Emissions from employee teleworking
			8	Upstream leased assets	• Operation of assets leased by the reporting company (lessee) in the reporting year and not included in scope 1 and scope 2 – reported by lessee	• The scope 1 and scope 2 emissions of lessors that occur during the reporting company’s operation of leased assets (e.g., from energy use) • Optional: The life cycle emissions associated with manufacturing or constructing leased assets
		Downstream	9	Downstream transportation and distribution	• Transportation and distribution of products sold by the reporting company in the reporting year between the reporting company’s operations and the end consumer (if not paid for by the reporting company), including retail and storage (in vehicles and facilities not owned or controlled by the reporting company)	• The scope 1 and scope 2 emissions of transportation providers, distributors, and retailers that occur during use of vehicles and facilities (e.g., from energy use) • Optional: The life cycle emissions associated with manufacturing vehicles, facilities, or infrastructure
			10	Processing of sold products	• Processing of intermediate products sold in the reporting year by downstream companies (e.g., manufacturers)	• The scope 1 and scope 2 emissions of downstream companies that occur during processing (e.g., from energy use)
			11	Use of sold products	• End use of goods and services sold by the reporting company in the reporting year	• The direct use-phase emissions of sold products over their expected lifetime (i.e., the scope 1 and scope 2 emissions of end users that occur from the use of: products that directly consume energy (fuels or electricity) during use; fuels and feedstocks; and GHGs and products that contain or form GHGs that are emitted during use) • Optional: The indirect use-phase emissions of sold products over…
			12	End-of-life treatment of sold products	• Waste disposal and treatment of products sold by the reporting company (in the reporting year) at the end of their life	• The scope 1 and scope 2 emissions of waste management companies that occur during disposal or treatment of sold products
			13	Downstream leased assets	• Operation of assets owned by the reporting company (lessor) and leased to other entities in the reporting year, not included in scope 1 and scope 2 – reported by lessor	• The scope 1 and scope 2 emissions of lessees that occur during operation of leased assets (e.g., from energy use). • Optional: The life cycle emissions associated with manufacturing or constructing leased assets
			14	Franchises	• Operation of franchises in the reporting year, not included in scope 1 and scope 2 – reported by franchisor	• The scope 1 and scope 2 emissions of franchisees that occur during operation of franchises (e.g., from energy use) • Optional: The life cycle emissions associated with manufacturing or constructing franchises
			15	Investments	• Operation of investments (including equity and debt investments and project finance) in the reporting year, not included in scope 1 or scope 2	• See the description of category 15 (Investments) in section 5.5 for the required and optional boundaries

[truncated: 5 more sheets: 3.4 Company selection, 4.1 Corporate reports, 4.2 CDP responses 2019 C.0-5, 4.3 CDP responses 2019 C.6, 4.4 CDP responses 2019 C.7-14]
